# Supplementary material
Source: PubMed Central journal article supplement (PMC6829050)
Supplement: NIHMS1051114-supplement-Supp.pdf [file NIHMS1051114-supplement-Supp.pdf]

# Structure Activity Relationship Towards Design of Cryptosporidium Specific Thymidylate Synthase Inhibitor

Czyzyk, D.J.<sup>a,‡</sup>, Valhondo, M.<sup>b,‡</sup>, Deiana, L.<sup>b</sup>, Jorgensen, W.L.<sup>b,\*</sup>, and Anderson, K.S.<sup>a,\*</sup>

<sup>a</sup>Department of Pharmacology, Yale University School of Medicine, 333 Cedar Street, New Haven, CT 06520, USA

<sup>b</sup>Department of Chemistry, Yale University, 225 Prospect Street, PO Box 208107, New Haven, CT 06520, USA

\*Corresponding author. Tel.: +1 203 432 6278; fax: +1 203 432 6299 (W.L.J.); Tel.: +1 203 785 7670; fax: +1 203 785 7670 (K.S.A.).

*E-mail address:* [william.jorgensen@yale.edu](mailto:william.jorgensen@yale.edu) (W.L. Jorgensen), [karen.anderson@yale.edu](mailto:karen.anderson@yale.edu) (K.S. Anderson)

<sup>‡</sup>Authors have contributed equally to this work.

## Supplementary Data

### TABLE OF CONTENTS

|                                                                                                               |           |
|---------------------------------------------------------------------------------------------------------------|-----------|
| 1. Synthesis of non-commercial amines intermediates <b>28a-b</b> , <b>28f-g</b> , <b>28i</b> and <b>28n-u</b> | S2 – S18  |
| 2. <sup>1</sup> H, <sup>13</sup> C and HRMS spectra of representative compounds                               | S19 – S26 |
| 3. Table S1. IC <sub>50</sub> (μM) for <i>C. hominis</i> TS and human TS                                      | S27       |
| 4. Table S2. X-Ray crystallography data collection and refinement statistics                                  | S28 – S29 |
| 5. Predicted binding pose of a biphenyl compound in <i>C. hominis</i> TS active site                          | S30       |
| 6. X-ray crystallography                                                                                      | S31 – S39 |
| 7. References                                                                                                 | S40       |

## 1. Synthesis of non-commercial amines intermediates 28a-b, 28f-g, 28i and 28n-u

### 1.1. Procedure for the synthesis of non-commercial amine intermediate 28a

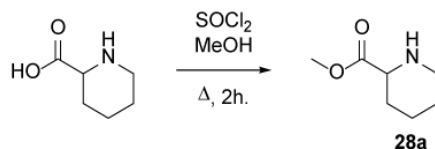

**Scheme S1.** Synthesis of amine intermediate 28a

A solution of piperidine-2-carboxylic acid (1 g, 5.98 mmol) in methanol (15,5 mL) was cooled to 0 °C followed by dropwise addition of thionyl chloride (1.4 mL). The mixture was stirred at reflux for 2 h. After evaporation of the solvent and neutralization by addition of a saturated aqueous  $\text{NaHCO}_3$  solution, the mixture was extracted with ethyl acetate (3 x 50 mL). The combined organic layers were then washed with saturated brine, dried over anhydrous  $\text{Na}_2\text{SO}_4$  and concentrated under reduced pressure. The crude product, a yellow oil, was used in subsequent reaction without purification *methyl piperidine-2-carboxylate* (28a).

#### *methyl piperidine-2-carboxylate* (28a)

(565 mg, 3.95 mmol, 51% yield).  $^1\text{H}$  NMR (400 MHz,  $\text{CDCl}_3$ )  $\delta$  3.71 (s, 3H), 3.35 (dd,  $J = 9.9$ , 3.2 Hz, 1H), 3.11 – 3.03 (m, 1H), 2.69 – 2.61 (m, 1H), 1.99 – 1.91 (m, 2H), 1.83 – 1.74 (m, 1H), 1.61 – 1.38 (m, 4H). LC-MS (ESI)  $m/z$  144.1  $[\text{M}+\text{H}]^+$ .

### 1.2. Procedure for the synthesis of non-commercial amine intermediate 28b

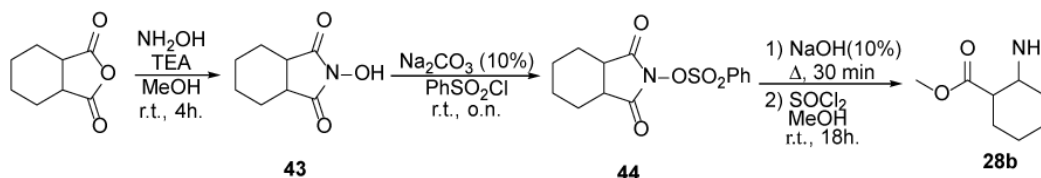

**Scheme S2.** Synthesis of amine intermediate 28b

A solution of hexahydrophthalic anhydride (5 g, 32.4 mmol) in methanol (32.5 mL) was added to a mixture of hydroxylamine hydrochloride (2.25 g, 32.4 mmol) and triethylamine (4.5 mL) in methanol (6.5 mL). After the reaction mixture was stirred for 4 h at room temperature, the solvent was removed under reduced pressure. The crude product was used in the subsequent reaction without purification as **N-Hydroxyimide (43)** (white solid). **43** (5.48 g, 32.4 mmol) in 40 mL of aqueous 10% Na<sub>2</sub>CO<sub>3</sub> solution with benzenesulfonyl chloride (4 mL) was stirred at room temperature overnight. Methanol was added to the mixture and cooled to -20 °C and the resulting precipitate was filtered to provide **N-phenyl-sulfonyloxyhexahydrophthalimide (44)** as a white solid, which was used in the subsequent reaction without purification. **44** (5.93 g, 19.17 mmol) was heated with 38 mL of aqueous 10% NaOH solution for 30 min. The clear solution was acidified with HCl and evaporated the solvent to dryness in vacuo.[1] The residue was dissolved in methanol (68.5 mL) and thionyl chloride (7.5 g, 63.12 mmol, 4.6 mL) was added dropwise at 0 °C. The mixture was allowed to warm to room temperature and stirred for 18 h. The clear solution was then evaporated to dryness, and the residual volatiles were removed on high vacuum. To the remaining crude material was added a saturated aqueous NaHCO<sub>3</sub> (20 mL) and the resulting mixture was stirred at 25 °C for 30 min. The reaction mixture was extracted with ethyl acetate (3 x 40 mL). The combined organic layers were dried over anhydrous MgSO<sub>4</sub>, filtered and concentrated in vacuo to provide **methyl 2-aminocyclohexane-1-carboxylate (28b)** as a brown oil, which was used in subsequent reaction without purification.

#### **N-Hydroxyimide (43)**

(5.48 g, 32.40 mmol, 99% yield). <sup>1</sup>H NMR (400 MHz, CDCl<sub>3</sub>) δ 5.43 (bs, 1H), 2.89 – 2.80 (m, 2H), 1.90 – 1.71 (m, 4H), 1.49 – 1.39 (m, 4H). 7.36 (d, *J* = 3.1 Hz, 1H), 6.96 (dd, *J* = 8.9, 3.1 Hz, 1H), 6.64 (d, *J* = 8.9 Hz, 1H), 3.89 (s, 3H), 3.77 (s, 3H). LC-MS (ESI) *m/z* 170.1 [M+H]<sup>+</sup>.

### **N-phenyl-sulfonyloxyhexahydrophthalimide (44)**

(5.93 g, 19.17 mmol, 59% yield).  $^1\text{H NMR}$  (400 MHz,  $\text{DMSO-}d_6$ )  $\delta$  8.05 – 7.99 (m, 2H), 7.93 – 7.87 (m, 1H), 7.76 – 7.69 (m, 2H), 3.08 (td,  $J = 4.5, 2.2$  Hz, 2H), 1.79 – 1.68 (m, 2H), 1.64 – 1.54 (m, 2H), 1.45 – 1.24 (m, 4H). LC-MS (ESI)  $m/z$  310.1  $[\text{M}+\text{H}]^+$ .

### **methyl 2-aminocyclohexane-1-carboxylate (28b)**

(677 mg, 4.3 mmol, 22% yield).  $^1\text{H NMR}$  (400 MHz,  $\text{CDCl}_3$ )  $\delta$  3.68 (s, 3H), 3.32 – 3.26 (m, 1H), 2.59 – 2.53 (m, 1H), 1.89 – 1.51 (m, 6H), 1.47 – 1.36 (m, 1H), 1.36 – 1.24 (m, 1H). LC-MS (ESI)  $m/z$  158.1  $[\text{M}+\text{H}]^+$ .

### **1.3. Procedure for the synthesis of non-commercial amine intermediate 28f**

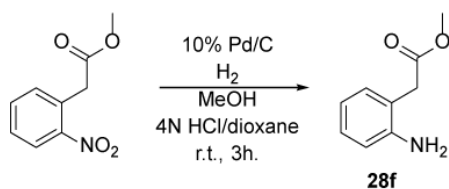

**Scheme S3.** Synthesis of amine intermediate **28f**

The 2-nitrophenyl acid methyl ester (1 g, 4.87 mmol, 95%) was dissolved in ethyl acetate (30 mL) and 0.26 g of Pd(C) 10% was suspended into the solution, the reaction mixture was maintained under hydrogen atmosphere at room temperature for 4 h.[2] The palladium was removed by filtration and concentrated under vacuo to yield **methyl 2-(2-aminophenyl)acetate (28f)** as an orange-red oil.

### **methyl 2-(2-aminophenyl)acetate (28f)**

(0.62 g, 3.75 mmol, 77% yield).  $^1\text{H NMR}$  (400 MHz,  $\text{CDCl}_3$ )  $\delta$  7.15 – 7.04 (m, 2H), 6.80 – 6.67 (m, 2H), 4.07 (bs, 2H), 3.69 (s, 3H), 3.57 (s, 2H). LC-MS (ESI)  $m/z$  166.1  $[\text{M}+\text{H}]^+$ .

#### 1.4. Procedure for the synthesis of non-commercial amine intermediate **28g**

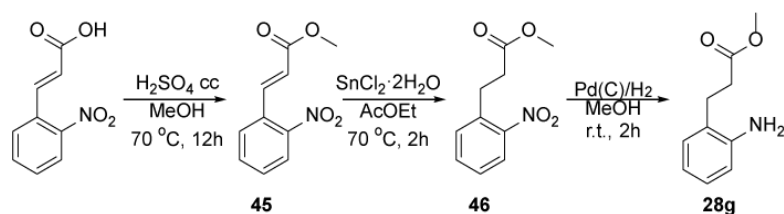

**Scheme S4.** Synthesis of amine intermediate **28g**

To a solution of 2-nitrocinnamic acid (5 g, 25.88 mmol) in methanol (96 mL) was dropped a small amount of concentrated sulfuric acid at room temperature and the reaction mixture was stirred at  $70\text{ }^\circ\text{C}$  for 12 h. After the reaction was complete, the resulting solution was basified with saturated aqueous solution of  $\text{NaHCO}_3$  to weak basicity and extracted with dichloromethane (3 x 100 mL). Then, the combined organic layers were dried over anhydrous  $\text{Na}_2\text{SO}_4$ , filtered and concentrated under vacuo[3]. **Methyl 2-nitrocinnamate (45)** was obtained as a yellow solid and used in the subsequent reaction without purification. To a solution of **45** (4.477 g, 21.61 mmol) in ethyl acetate (130 mL) was added  $\text{SnCl}_2 \cdot \text{H}_2\text{O}$  (60.06 g, 0.27 mol) at room temperature, and the resulting solution was stirred at  $70\text{ }^\circ\text{C}$  for 2 h. After the reaction was complete, the solution was poured into 57 mL of cool water and cooled in an ice bath. This was followed by careful addition of saturated aqueous solution of  $\text{NaHCO}_3$  to weak basicity (800 mL), and filtration over Celite. The aqueous phase was extracted with ethyl acetate three times, and the combined organic phases were dried over anhydrous  $\text{Na}_2\text{SO}_4$  followed by solvent evaporation under reduced pressure to give **methyl 2-aminocinnamate (46)**[4] as a yellow solid which was used in the subsequent reaction without purification. A mixture of methyl 2-aminocinnamate (**46**) (3.59 g, 20.27 mmol) and 360 mg of  $\text{Pd(C)}$  10% in 185 mL of methanol were pressurized with a balloon of hydrogen (5 bar) for 2 h at room temperature. The reaction mixture was filtered over Celite and methanol was removed by distillation in vacuo to give **methyl 3-(2-aminophenyl)propanoate (28g)**[4] as a brown oil.

### Methyl 2-nitrocinnamate (45)

(5.25 g, 25.36 mmol, 98% yield).  $^1\text{H NMR}$  (400 MHz,  $\text{CDCl}_3$ )  $\delta$  8.11 (d,  $J = 15.8$  Hz, 1H), 8.04 (d,  $J = 8.1$  Hz, 1H), 7.70 – 7.59 (m, 2H), 7.54 (td,  $J = 7.5, 6.7, 2.2$  Hz, 1H), 6.36 (d,  $J = 15.8$  Hz, 1H), 3.82 (s, 3H). LC-MS (ESI)  $m/z$  208.1  $[\text{M}+\text{H}]^+$ .

### methyl 2-aminocinnamate (46)

(3.59 g, 20.27 mmol, 94% yield).  $^1\text{H NMR}$  (500 MHz,  $\text{CDCl}_3$ )  $\delta$  7.83 (d,  $J = 15.8$  Hz, 1H), 7.38 (d,  $J = 7.8$  Hz, 1H), 7.18 (t,  $J = 7.6$  Hz, 1H), 6.77 (t,  $J = 7.5$  Hz, 1H), 6.70 (d,  $J = 8.1$  Hz, 1H), 6.36 (d,  $J = 15.8$  Hz, 1H), 3.96 (bs, 2H), 3.80 (s, 3H). LC-MS (ESI)  $m/z$  178.1  $[\text{M}+\text{H}]^+$ .

### methyl 3-(2-aminophenyl)propanoate (28g)

(3.59 g, 19.15 mmol, 95% yield).  $^1\text{H NMR}$  (400 MHz,  $\text{CDCl}_3$ )  $\delta$  7.04 (t,  $J = 7.9$  Hz, 2H), 6.77 – 6.71 (m, 1H), 6.68 (d,  $J = 7.8$  Hz, 1H), 3.79 (s, 2H), 3.68 (s, 3H), 2.84 (t,  $J = 7.6$  Hz, 2H), 2.66 (t,  $J = 7.5$  Hz, 2H). LC-MS (ESI)  $m/z$  180.1  $[\text{M}+\text{H}]^+$ .

## 1.5. Procedure for the synthesis of non-commercial amine intermediate 28i

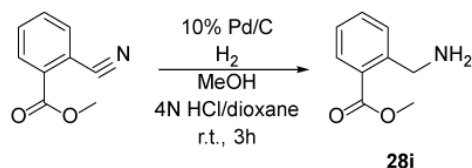

**Scheme S5.** Synthesis of amines intermediate **28i**

A mixture of methyl 2-cyanobenzoate (0.65 g, 4.05 mmol) and  $\text{PtO}_2$  (65 mg) in 13 mL ethanol and 0.65 mL of chloroform was hydrogenated under hydrogen balloon for 2 h. The reaction mixture was then filtered through Celite and concentrated on a rotary evaporator to give **methyl 2-(aminomethyl)benzoate (28i)**[2].

### methyl 2-(aminomethyl)benzoate (**28i**)

(0.296 g, 1.79 mmol, 41% yield).  $^1\text{H NMR}$  (400 MHz, Acetone- $d_6$ )  $\delta$  8.03 (dd,  $J = 7.9, 1.6$  Hz, 1H), 7.70 (d,  $J = 7.8$  Hz, 1H), 7.62 (td,  $J = 7.6, 1.5$  Hz, 1H), 7.49 (t,  $J = 7.7$  Hz, 1H), 5.30 (s, 2H), 3.91 (s, 3H). LC-MS (ESI)  $m/z$  201.1  $[\text{M}+\text{H}]^+$ .

### 1.6. Procedure for the synthesis of non-commercial amine intermediates **28n-o**

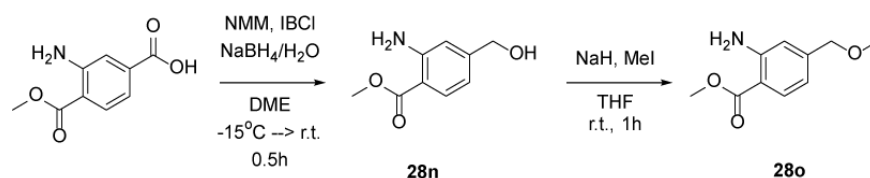

**Scheme S6.** Synthesis of amines intermediate **28n** and **28o**

To a solution of 1-methyl 2-aminoterephthalate (1 g, 5.12 mmol) and NMM (0.58 mL, 1 eq) in DME (9 mL) at -15 °C was added dropwise IBCl (0.67 mL, 1 eq). The mixture was then stirred at this temperature for 15 min. The salt was removed by filtration and the solution was cooled down to -15 °C. A solution of NaBH<sub>4</sub> (306 mg, 1.5 eq) in water (3 mL) was carefully added dropwise. At the end of the addition, water (10 mL) was added and the mixture was stirred at r.t. for 15 min. Aqueous NaOH solution (2N, 5 mL) was added and the aqueous phase was extracted twice with ethyl acetate. The organic phases were combined and dried over anhydrous Na<sub>2</sub>SO<sub>4</sub>. The solution was concentrated in vacuo to afford **methyl 2-amino-4-(hydroxymethyl)benzoate (28n)**[3] as a white solid. To NaH (243 mg, 3.3 mmol, 60% in oil) in THF (18 mL) was added successively (**28n**) (1 g, 5.52 mmol) and MeI (784 mg, 5.52 mmol). After 1 h, the reaction was quenched by addition of NaCl(aq), extracted with diethyl ether, dried over anhydrous Na<sub>2</sub>SO<sub>4</sub> and concentrated in vacuo. The crude residue was purified by flash column chromatography (0-40 % EtOAc in dichloromethane) to provide **methyl 2-amino-4-(methoxymethyl)benzoate (28o)** as a yellow oil.

**methyl 2-amino-4-(hydroxymethyl)benzoate (28n)**

(800 g, 86% yield). <sup>1</sup>H NMR (400 MHz, CDCl<sub>3</sub>) δ 7.82 (d, *J* = 8.2 Hz, 1H), 6.68 (s, 1H), 6.60 (dd, *J* = 8.3, 1.6 Hz, 1H), 4.62 (s, 2H), 3.86 (s, 3H). LC-MS (ESI) *m/z* 182.1 [M+H]<sup>+</sup>.

**methyl 2-amino-4-(methoxymethyl)benzoate (28o)**

(197 mg, 1.01 mmol, 18% yield). <sup>1</sup>H NMR (400 MHz, CDCl<sub>3</sub>) δ 7.82 (d, *J* = 8.2 Hz, 1H), 6.65 (d, *J* = 1.7 Hz, 1H), 6.58 (dd, *J* = 8.2, 1.6 Hz, 1H), 5.73 (bs, 2H), 4.38 (s, 2H), 3.86 (s, 3H), 3.39 (s, 3H). LC-MS (ESI) *m/z* 196.1 [M+H]<sup>+</sup>.

**1.7. Procedure for the synthesis of non-commercial amine intermediate 28p**

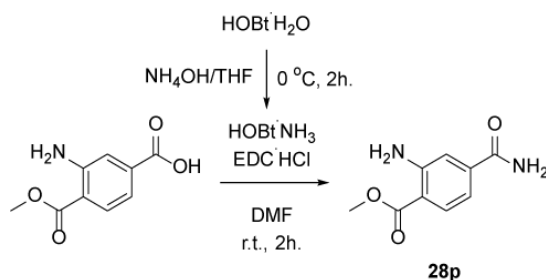

**Scheme S7.** Synthesis of amines intermediate **28p**

To a solution of 1-methyl-2-aminoterephthalate (1g, 5.12 mmol) in DMF (5 mL) was added 1-hydroxy-1H-benzotriazole ammonium salt (858 mg, 5.64 mmol) and 1-ethyl-(3-dimethylaminopropyl)carbodiimide hydrochloride (1.08g, 5.64 mmol) under ice-cooling, and the mixture was stirred for 1.5 h at the same temperature and then for 30 min at room temperature. The reaction mixture was combined with icewater, and the precipitated crystals were collected by filtration, and washed with water and diethyl ether. The filtrate was neutralized with NaHCO<sub>3</sub> and extracted (4 x 25 mL) with a mixed solution of tetrahydrofuran and ethyl acetate. The combined organic layers were dried over anhydrous Na<sub>2</sub>SO<sub>4</sub>, filtered, and concentrated in



vacuo. The crude residue was purified by flash column chromatography (0-10 % methanol in dichloromethane) to provide **methyl 2-amino-4-carbamoylbenzoate (28p)** as a white solid.

### **methyl 2-amino-4-carbamoylbenzoate (28p)**

(880 mg, 4.53 mmol, 88% yield)  $^1\text{H NMR}$  (400 MHz,  $\text{DMSO-}d_6$ )  $\delta$  7.90 (s, 1H), 7.72 (d,  $J = 8.3$  Hz, 1H), 7.37 (bs, 1H), 7.24 (d,  $J = 1.6$  Hz, 1H), 6.94 (dd,  $J = 8.3, 1.7$  Hz, 1H), 6.74 (bs, 2H), 3.80 (s, 3H). LC-MS (ESI)  $m/z$  194.1  $[\text{M}+\text{H}]^+$ .

### **1.8. Procedure for the synthesis of non-commercial amine intermediate 28q**

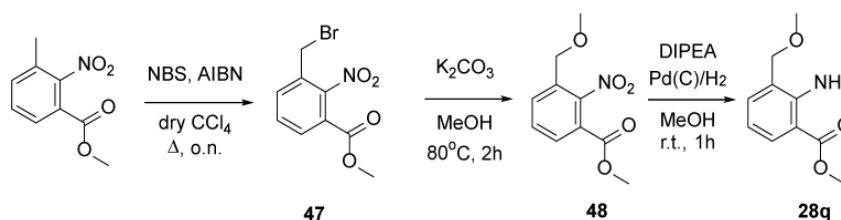

**Scheme S8.** Synthesis of amine intermediate 28q

2-nitro-3-methylbenzoic acid methyl ester (5g, 25.62 mmol), N-bromosuccinimide (5.34 g, 30 mmol) and azodiisobutyronitrile (30 mg, 0.183 mmol) were dissolved in 50 mL dry  $\text{CCl}_4$  and the reaction mixture was refluxed overnight. After completion of the reaction, the residue was poured into water, and then was extracted with ethyl acetate (3 x 50 mL). The organic layers were combined and washed with saturated NaCl solution, dried over anhydrous  $\text{NaSO}_4$ , filtered and concentrated in vacuo. The crude residue was purified by flash column chromatography (0-20 % ethyl acetate in hexane) to provide **methyl 3-(bromomethyl)-2-nitrobenzoate (47)** as an orange oil. Methyl 3-(bromomethyl)-2-nitrobenzoate (47) (700 mg, 2.55 mmol) was dissolved in methanol (35 mL) and  $\text{K}_2\text{CO}_3$  (354 mg, 2.55 mmol) was added. The mixture was stirred 2 h at  $80^\circ\text{C}$  and was concentrated in vacuo to provide **methyl 3-(methoxymethyl)-2-nitrobenzoate (48)** as an orange oil. The crude product was used in the subsequent reaction without

purification. A mixture of methyl 3-(methoxymethyl)-2-nitrobenzoate (**48**) (434 mg, 1.93 mmol), DIPEA (64 mL) and 206 mg of palladium on charcoal (10%) in 10 mL of methanol were pressurized with a balloon of hydrogen (5 bar) 50 min at room temperature. After the reaction was completed, filtered through celite, dried over anhydrous Na<sub>2</sub>SO<sub>4</sub> and concentrated in vacuo to provide **methyl 2-(2-amino-4-methoxyphenyl)acetate (28q)** as an yellow oil. The crude product was used in subsequent reaction without purification.

**methyl 3-(bromomethyl)-2-nitrobenzoate (47)**

(1.41 g, 5.16 mmol, 20% yield). <sup>1</sup>H NMR (400 MHz, CDCl<sub>3</sub>) δ 7.96 (dd, *J* = 7.8, 1.4 Hz, 1H), 7.74 (dd, *J* = 7.8, 1.4 Hz, 1H), 7.58 (t, *J* = 7.8 Hz, 1H), 4.45 (s, 2H), 3.90 (s, 3H). LC-MS (ESI) *m/z* 275.1 [M+H]<sup>+</sup>.

**methyl 3-(methoxymethyl)-2-nitrobenzoate (48)**

(434 mg, 1.93 mmol, 76% yield). <sup>1</sup>H NMR (400 MHz, CDCl<sub>3</sub>) δ 7.91 (dd, *J* = 7.8, 1.4 Hz, 1H), 7.78 (dd, *J* = 7.8, 1.5 Hz, 1H), 7.58 (t, *J* = 7.8 Hz, 1H), 4.50 (s, 2H), 3.90 (s, 3H), 3.40 (s, 3H). LC-MS (ESI) *m/z* 226.1 [M+H]<sup>+</sup>.

**methyl 2-(2-amino-4-methoxyphenyl)acetate (28q)**

(350 mg, 1.79 mmol, 93% yield). <sup>1</sup>H NMR (400 MHz, CDCl<sub>3</sub>) δ 7.87 (dd, *J* = 8.1, 1.7 Hz, 1H), 7.20 (dd, *J* = 7.2, 1.7 Hz, 1H), 6.60 (t, *J* = 7.4 Hz, 1H), 6.42 – 6.34 (s, 2H), 4.49 (s, 2H), 3.87 (s, 3H), 3.33 (s, 3H). LC-MS (ESI) *m/z* 196.1 [M+H]<sup>+</sup>.

### 1.9. Procedure for the synthesis of non-commercial amine intermediate 28r

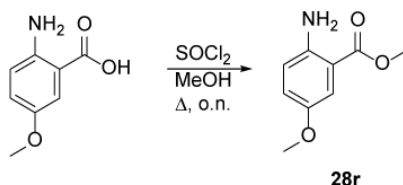

**Scheme S9.** Synthesis of amine intermediate **28r**

A solution of 2-amino-5-methoxybenzoic acid (1 g, 5.98 mmol) was dissolved in methanol (12 mL), cooled to 0 °C, and followed by dropwise addition of thionyl chloride (1.1 mL). The mixture was stirred overnight at reflux. After evaporation of the solvent, and neutralized by addition of a saturated aqueous  $\text{NaHCO}_3$  solution, mixture was extracted with ethyl acetate (3 x 50 mL). The combined organic layers were washed with saturated brine, dried over anhydrous  $\text{Na}_2\text{SO}_4$  and concentrated in vacuo, providing **methyl 2-amino-5-methoxybenzoate (28r)** as a brown oil. The crude product was used in subsequent reaction without purification.

#### **methyl 2-amino-5-methoxybenzoate (28r)**

(98 mg, 3.3 mmol, 55% yield).  $^1\text{H NMR}$  (400 MHz,  $\text{CDCl}_3$ )  $\delta$  7.36 (d,  $J = 3.1$  Hz, 1H), 6.96 (dd,  $J = 8.9, 3.1$  Hz, 1H), 6.64 (d,  $J = 8.9$  Hz, 1H), 3.89 (s, 3H), 3.77 (s, 3H). LC-MS (ESI)  $m/z$  182.1  $[\text{M}+\text{H}]^+$ .

### 1.10. Procedure for the synthesis of non-commercial amine intermediate 28s

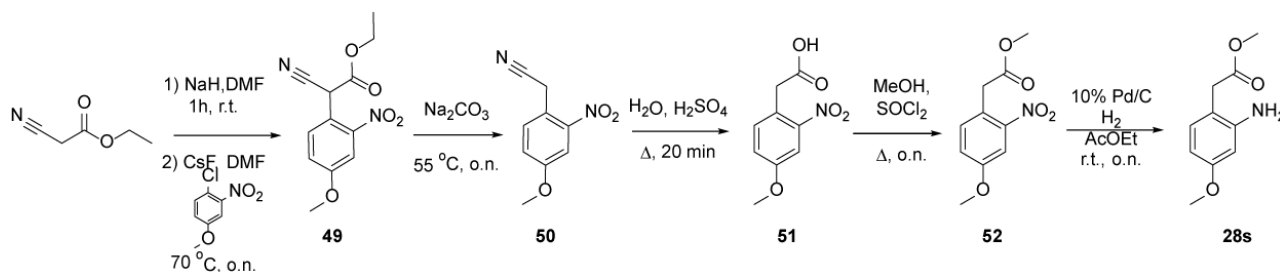

**Scheme S10.** Synthesis of amine intermediate **28s**

Ethyl cyanoacetate (2.56 mL, 24.0 mmol) was added dropwise to a suspension of 959 mg of NaH (60%, 24.0 mmol) in 10 mL of DMF. The mixture was stirred for 1 h at room temperature. CsF (61 mg, 0.4 mmol) and a solution of 4-chloro-3-nitro-anisole (1.5 g, 8.0 mmol) in 2 mL of DMF were added and the mixture was stirred overnight at 70 °C. The reaction mixture was cooled to room temperature and was quenched by the addition of 5 ml of water. Aqueous 1N HCl (5 mL) was added to adjust the pH to 3-4 and the mixture was diluted with dichloromethane. The organic layer was washed with saturated brine, dried over anhydrous Na<sub>2</sub>SO<sub>4</sub>, and concentrated in vacuo. The crude product was purified by flash column chromatography (0-40 % EtOAc in hexane) to provide **cyano-(4-methoxy-2-nitro-phenyl)-acetic acid ethyl ester (49)**[5] as an orange oil. To cyano-(4-methoxy-2-nitro-phenyl)-acetic acid ethyl ester (**49**) (1.43 g, 5.43 mmol) was added 46 mL of a saturated solution of aqueous sodium carbonate. The mixture was stirred overnight at 55 °C. After cooling to room temperature, the mixture was diluted with ethyl acetate. The organic layer was washed with saturated brine, dried over anhydrous Na<sub>2</sub>SO<sub>4</sub> and concentrated in vacuo to provide **(4-methoxy-2-nitro-phenyl)-acetonitrile (50)**[5] as an orange oil. The crude product was used in the subsequent reaction without purification. A suspension of (4-methoxy-2-nitro-phenyl)-acetonitrile (**50**) (906 mg, 4.71 mmol) in a mixture of 10.6 mL of water and 7 mL of concentrated sulfuric acid was heated at reflux. After 20 min, the reaction mixture was treated with ice resulting in the precipitation of brown solids. After filtration **(4-methoxy-2-nitro-phenyl)-acetic acid (51)** was obtained as a brown solid. The crude product was used in subsequent reaction without purification. (4-methoxy-2-nitro-phenyl)-acetic acid (**51**) (657 mg, 3.11 mmol) was dissolved in methanol (8.7 mL) and thionyl chloride (0.7 mL, 9.33 mmol) was added. The mixture was stirred overnight at reflux and was concentrated in vacuo. The residue was partitioned between 200 mL of ethyl acetate and 40 mL of saturated aqueous NaHCO<sub>3</sub>. The organic layer was washed with saturated brine, dried over anhydrous Na<sub>2</sub>SO<sub>4</sub> and concentrated in vacuo. The crude product was purified by flash column chromatography (0-40 % EtOAc in hexanes) to provide **(4-**

**(4-methoxy-2-nitro-phenyl)-acetic acid methyl ester (52)** as an orange oil. A mixture of (4-methoxy-2-nitro-phenyl)-acetic acid methyl ester (**52**) (607 mg, 2.69 mmol) and 144 mg of palladium on charcoal (10%) in 11 mL of ethyl acetate were pressurized with a balloon of hydrogen (5 bar) overnight at room temperature. After the reaction was completed, the solution was filtered through celite, dried over anhydrous Na<sub>2</sub>SO<sub>4</sub> and concentrated in vacuo. The crude product was purified by flash column chromatography (0-40 % EtOAc in dichloromethane) to provide **methyl 2-(2-amino-4-methoxyphenyl)acetate (28s)** as a yellow oil.

**cyano-(4-methoxy-2-nitro-phenyl)-acetic acid ethyl ester (49)**

(1.44 g, 5.43 mmol, 68% yield). <sup>1</sup>H NMR (400 MHz, CDCl<sub>3</sub>) δ 7.73 (d, *J* = 2.8 Hz, 1H), 7.65 (d, *J* = 8.6 Hz, 1H), 7.27 – 7.23 (m, 1H), 5.55 (s, 1H), 4.30 (q, *J* = 7.1 Hz, 2H), 3.92 (s, 3H), 1.32 (t, *J* = 7.1 Hz, 3H). LC-MS (ESI) *m/z* 265.1 [M+H]<sup>+</sup>.

**(4-methoxy-2-nitro-phenyl)-acetonitrile (50)**

(908 mg, 4.72 mmol, 87% yield). <sup>1</sup>H NMR (500 MHz, CDCl<sub>3</sub>) δ 7.70 (d, *J* = 2.7 Hz, 1H), 7.60 (d, *J* = 8.6 Hz, 1H), 7.22 (dd, *J* = 8.6, 2.7 Hz, 1H), 4.12 (s, 2H), 3.90 (s, 3H). LC-MS (ESI) *m/z* 192.1 [M+H]<sup>+</sup>.

**(4-methoxy-2-nitro-phenyl)-acetic acid (51)**

(660 mg, 3.13 mmol, 66% yield). <sup>1</sup>H NMR (500 MHz, DMSO-*d*<sub>6</sub>) δ 7.66 (d, *J* = 2.7 Hz, 1H), 7.63 (d, *J* = 8.6 Hz, 1H), 7.40 (dd, *J* = 8.6, 2.8 Hz, 1H), 4.22 (s, 2H), 3.87 (s, 3H). LC-MS (ESI) *m/z* 212.1 [M+H]<sup>+</sup>.

### (4-methoxy-2-nitro-phenyl)-acetic acid methyl ester (**52**)

(607 mg, 2.7 mmol, 87% yield).  $^1\text{H NMR}$  (400 MHz,  $\text{CDCl}_3$ )  $\delta$  7.64 (d,  $J = 2.7$  Hz, 1H), 7.25 (d,  $J = 8.6$  Hz, 2H), 7.13 (dd,  $J = 8.5, 2.7$  Hz, 1H), 3.95 (s, 2H), 3.88 (s, 3H), 3.71 (s, 3H). LC-MS (ESI)  $m/z$  226.1  $[\text{M}+\text{H}]^+$ .

### methyl 2-(2-amino-4-methoxyphenyl)acetate (**28s**)

(393 mg, 2.012 mmol, 75% yield).  $^1\text{H NMR}$  (400 MHz,  $\text{CDCl}_3$ )  $\delta$  6.98 (d,  $J = 8.3$  Hz, 1H), 6.32 (dd,  $J = 8.3, 2.6$  Hz, 1H), 6.27 (d,  $J = 2.5$  Hz, 1H), 4.07 (bs, 2H), 3.75 (s, 3H), 3.68 (s, 3H), 3.50 (s, 2H). LC-MS (ESI)  $m/z$  196.1  $[\text{M}+\text{H}]^+$ .

#### 1.11. Procedure for the synthesis of non-commercial amine intermediate **28t**

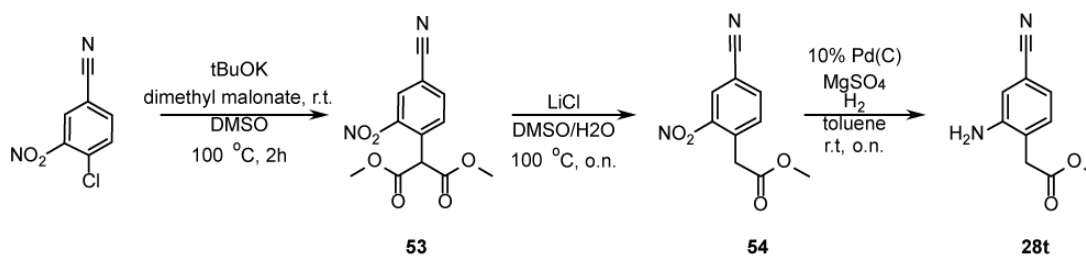

**Scheme S11.** Synthesis of amine intermediate **28t**

Potassium tert-butoxide (4.39 g, 37.2 mmol) was dissolved in dimethylsulfoxide (13.5 mL) at  $20\text{ }^\circ\text{C}$ , and dimethyl malonate (4.96 g, 37.2 mmol, 4.3 mL) was slowly added. Stirring was continued for 1 h at room temperature. After that time, 4-chloro-3-nitro-benzonitrile (2 g, 10.6 mmol) was slowly added and the mixture was stirred at  $100\text{ }^\circ\text{C}$  for 1 h. After being cooled, the mixture was poured into water (100 mL) and neutralized with 1N HCl (pH 7). The precipitate was filtered off and washed with water. The residue was taken up in DCM (100 mL), extracted with water (100 mL), and dried over anhydrous  $\text{Na}_2\text{SO}_4$  to give **dimethyl 2-(4-cyano-2-nitro-phenyl)propanedioate** (**53**) as a white solid, which was used in the next reaction without purification. Dimethyl 2-(4-cyano-2-nitro-phenyl)propanedioate (**53**) (3.40 g, 12.2 mmol) was

dissolved in dimethylsulfoxide (60 mL), and LiCl (1.05 g, 24.4 mmol) and water (0.22 mL) were added. The mixture was stirred overnight at 100 °C. After being cooled, the mixture was poured into ice water (250 mL) and stirred for 10 min. The mixture was extracted with dichloromethane (3 x 125 mL) and the organic phase was washed with saturated aqueous solution NaCl (3 x 200 mL). The organic layer was dried over anhydrous Na<sub>2</sub>SO<sub>4</sub>, filtered and the solvent was evaporated. The crude was purified by flash column chromatography (hexanes to hexanes in ethyl acetate 6:4). **Methyl 2-(4-cyano-2-nitro-phenyl)acetate (54)** as a yellow solid. To a solution of methyl 2-(4-cyano-2-nitro-phenyl)acetate (**54**) (1.63 g, 7.40 mmol) in toluene (23 mL) was added MgSO<sub>4</sub> (446 mg, 3.70 mmol) and 10 % Pd/C (50% water) (156 mg) and the mixture was subjected to catalytic reaction at room temperature overnight under hydrogen atmosphere. The catalyst and magnesium sulfate were separated by filtration over celite and the filtrate was concentrated under reduced pressure to give the **methyl 2-(2-amino-4-cyano-phenyl)acetate (28t)** as a yellow solid.

**dimethyl 2-(4-cyano-2-nitro-phenyl)propanedioate (53)**

(2.85 g, 10.2 mmol, 96% yield). <sup>1</sup>H NMR (400 MHz, CDCl<sub>3</sub>) δ 8.35 (d, *J* = 1.7 Hz, 1H), 7.92 (dd, *J* = 8.2, 1.7 Hz, 1H), 7.73 (d, *J* = 8.1 Hz, 1H), 5.37 (s, 1H), 3.82 (s, 6H). LC-MS (ESI) *m/z* 277.1 [M+H]<sup>+</sup>.

**Methyl 2-(4-cyano-2-nitro-phenyl)acetate (54)**

(1.64 g, 7.43 mmol, 61% yield). <sup>1</sup>H NMR (400 MHz, CDCl<sub>3</sub>) δ 8.41 (d, *J* = 1.7 Hz, 1H), 7.88 (dd, *J* = 8.0, 1.7 Hz, 1H), 7.53 (d, *J* = 7.9 Hz, 1H), 4.11 (s, 2H), 3.73 (s, 3H). LC-MS (ESI) *m/z* 219.0 [M+H]<sup>+</sup>.

**methyl 2-(2-amino-4-cyano-phenyl)acetate (28t)**

(1.32 g, 6.95 mmol, 94% yield). <sup>1</sup>H NMR (500 MHz, CDCl<sub>3</sub>) δ 7.15 (d, *J* = 7.7 Hz, 1H), 7.01 (dd, *J* = 7.7, 1.6 Hz, 1H), 6.95 (d, *J* = 1.6 Hz, 1H), 4.28 (s, 2H), 3.71 (s, 3H), 3.59 (s, 2H). LC-MS (ESI) *m/z* 191.1 [M+H]<sup>+</sup>.

**1.12. Procedure for the synthesis of non-commercial amine intermediate 28u**

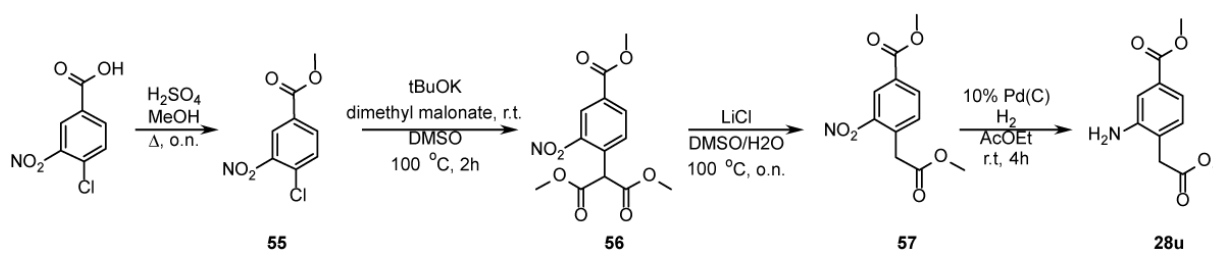

To a solution of 4-chloro-3-nitrobenzoic acid (4.00 g, 19.8 mmol) in methanol (30 mL) was added concentrated sulfuric acid (98%, 8.00 mL, 194 mmol) and the reaction mixture was refluxed for 16 h. The solvent was evaporated, water (100 mL) was added and the mixture extracted with ethyl acetate (3 × 25 mL). The combined organic layers were dried over anhydrous Na<sub>2</sub>SO<sub>4</sub>, filtered and concentrated to obtain **methyl 4-chloro-3-nitrobenzoate (55)** as a yellow solid. Potassium tert-butoxide (7.28 g, 64.9 mmol) was dissolved in dimethyl sulfoxide (23 mL) at 20 °C, and dimethyl malonate (7.42 mL, 64.9 mmol) was slowly added, stirring was continued for 1 h at room temperature. After, methyl 4-chloro-3-nitrobenzoate (**55**) (4.00 g, 18.5 mmol) was slowly added and the mixture was stirred at 100 °C for 1 h. After being cooled, the mixture was poured into water (100 mL) and neutralized with 1N HCl (2.5 mL). Dichloromethane (100 mL) was added and the phases were separated. The organic layer was washed with water (100 mL) and dried over anhydrous Na<sub>2</sub>SO<sub>4</sub> to provide **dimethyl 2-(4-methoxycarbonyl-2-nitrophenyl)propanedioate (56)** as a yellow solid. Dimethyl 2-(4-



methoxycarbonyl-2-nitro-phenyl)propanedioate (**56**) (1 g, 3.21 mmol) was dissolved in dimethylsulfoxide (15.8 mL), and LiCl (272 mg, 6.43 mmol) and water (0.6 mL) were added. The mixture was stirred overnight at 100 °C. After being cooled, the mixture was poured into ice water (50 mL) and stirred for 10 min. The mixture was extracted with dichloromethane (3 x 25 mL) and the organic phase was washed with saturated aqueous solution NaCl (3 x 40 mL). The organic layer was dried over anhydrous Na<sub>2</sub>SO<sub>4</sub>, filtered and the solvent was evaporated. The crude was purified by flash column chromatography (hexanes to hexanes in ethyl acetate 6:4) to provide **methyl 4-(2-methoxy-2-oxo-ethyl)-3-nitro-benzoate (57)** as a yellow solid. To a solution of methyl 4-(2-methoxy-2-oxo-ethyl)-3-nitro-benzoate (**57**) (3.64 g, 14.40 mmol) in ethyl acetate (59 mL), 0.76 g of Pd(C) 10% was suspended into the solution, the reaction mixture was under hydrogen atmosphere at room temperature for 4 h. The palladium was removed by filtration and concentrated under vacuo to yield **methyl 3-amino-4-(2-methoxy-2-oxoethyl)benzoate (28u)** as a yellow oil.

**methyl 4-chloro-3-nitro-benzoate (55)**

(4.00 g, 18.5 mmol, 93% yield). <sup>1</sup>H NMR (400 MHz, CDCl<sub>3</sub>) δ 8.51 (d, *J* = 2.0 Hz, 1H), 8.16 (dd, *J* = 8.4, 2.0 Hz, 1H), 7.65 (d, *J* = 8.4 Hz, 1H), 3.97 (s, 3H). LC-MS (ESI) *m/z* 216.1 [M+H]<sup>+</sup>.

**dimethyl 2-(4-methoxycarbonyl-2-nitro-phenyl)propanedioate (56)**

(5.47 g, 17.58 mmol, 95% yield). <sup>1</sup>H NMR (400 MHz, CDCl<sub>3</sub>) δ 8.68 (d, *J* = 1.8 Hz, 1H), 8.27 (dd, *J* = 8.2, 1.8 Hz, 1H), 7.61 (d, *J* = 8.1 Hz, 1H), 5.35 (s, 1H), 3.97 (s, 3H), 3.80 (s, 6H). LC-MS (ESI) *m/z* 312.1 [M+H]<sup>+</sup>.

**methyl 4-(2-methoxy-2-oxo-ethyl)-3-nitro-benzoate (57)**

(1.64 g, 7.43 mmol, 61% yield). <sup>1</sup>H NMR (400 MHz, CDCl<sub>3</sub>) δ 8.41 (d, *J* = 1.7 Hz, 1H), 7.88 (dd, *J* = 8.0, 1.7 Hz, 1H), 7.53 (d, *J* = 7.9 Hz, 1H), 4.11 (s, 2H), 3.73 (s, 3H). LC-MS (ESI) *m/z* 219.0 [M+H]<sup>+</sup>.

**methyl 3-amino-4-(2-methoxy-2-oxoethyl)benzoate (28u)**

(2.89 g, 12.9 mmol, 90% yield). <sup>1</sup>H NMR (500 MHz, CDCl<sub>3</sub>) δ 7.41 – 7.38 (m, 2H), 7.14 (d, *J* = 7.7 Hz, 1H), 4.18 (s, 2H), 3.88 (s, 3H), 3.69 (s, 3H), 3.60 (s, 2H). LC-MS (ESI) *m/z* 224,1 [M+H]<sup>+</sup>

## 2. $^1\text{H}$ , $^{13}\text{C}$ and HRMS spectra of representative compounds

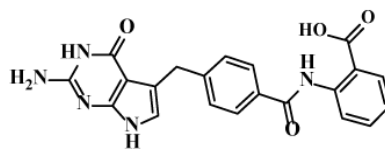

2

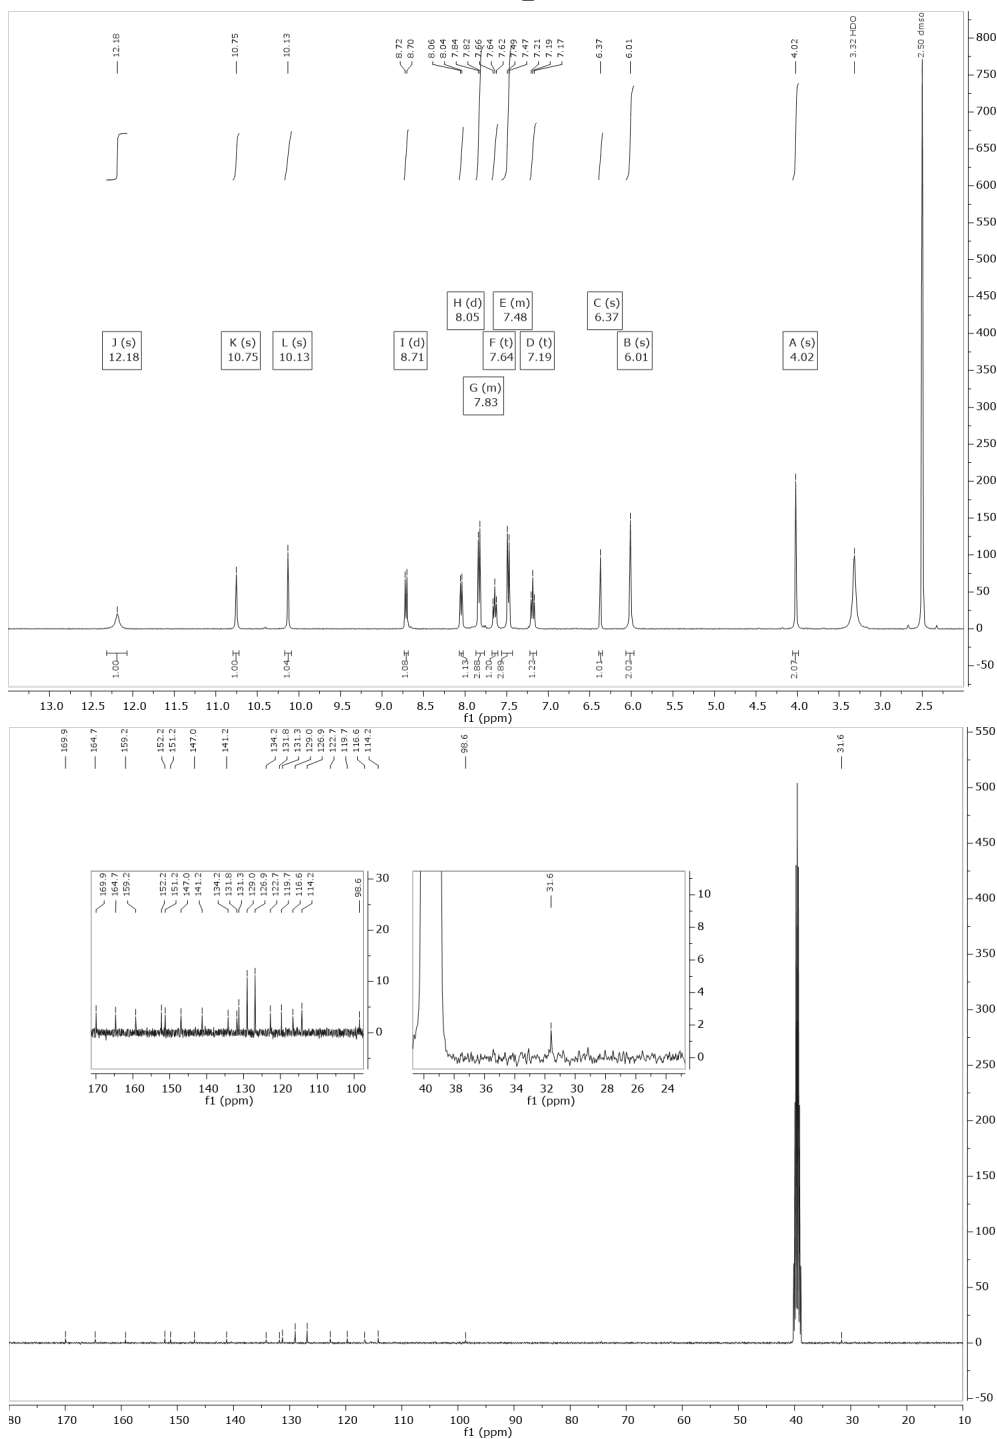

Cal 20190827  
mel\_LD149 (0.019) Is (1.00,1.00) C21H18N5O4

1: TOF MS ES+  
7.69e12

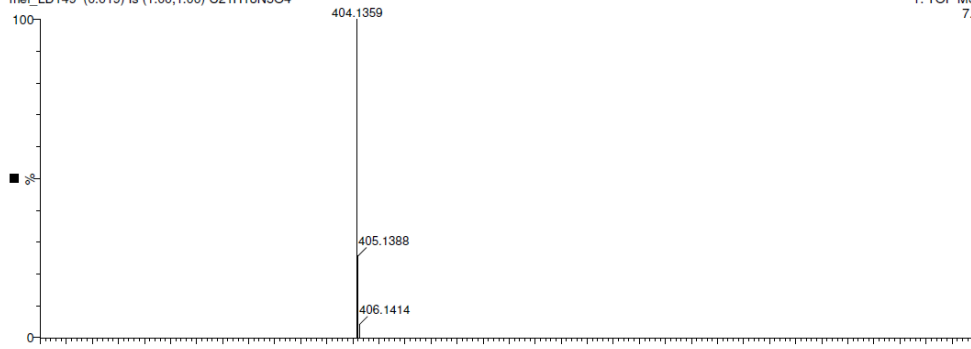

mel\_LD149 356 (1.499) Cm (356:371)

1: TOF MS ES+  
3.35e4

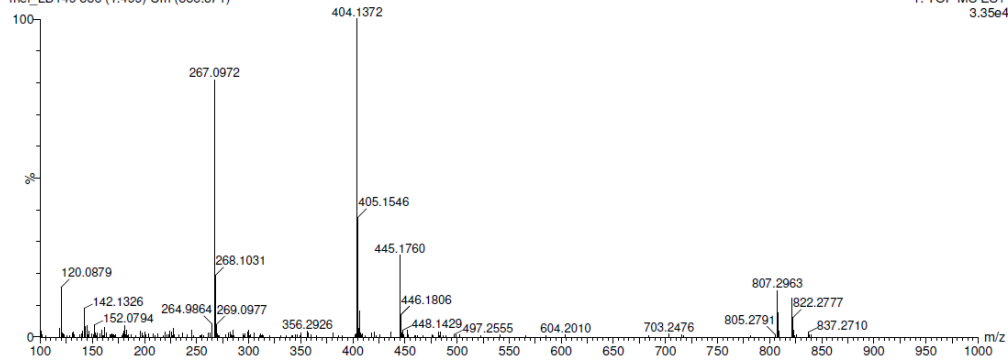

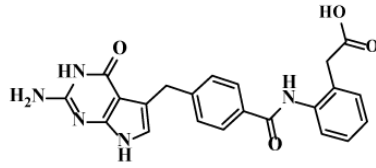

5

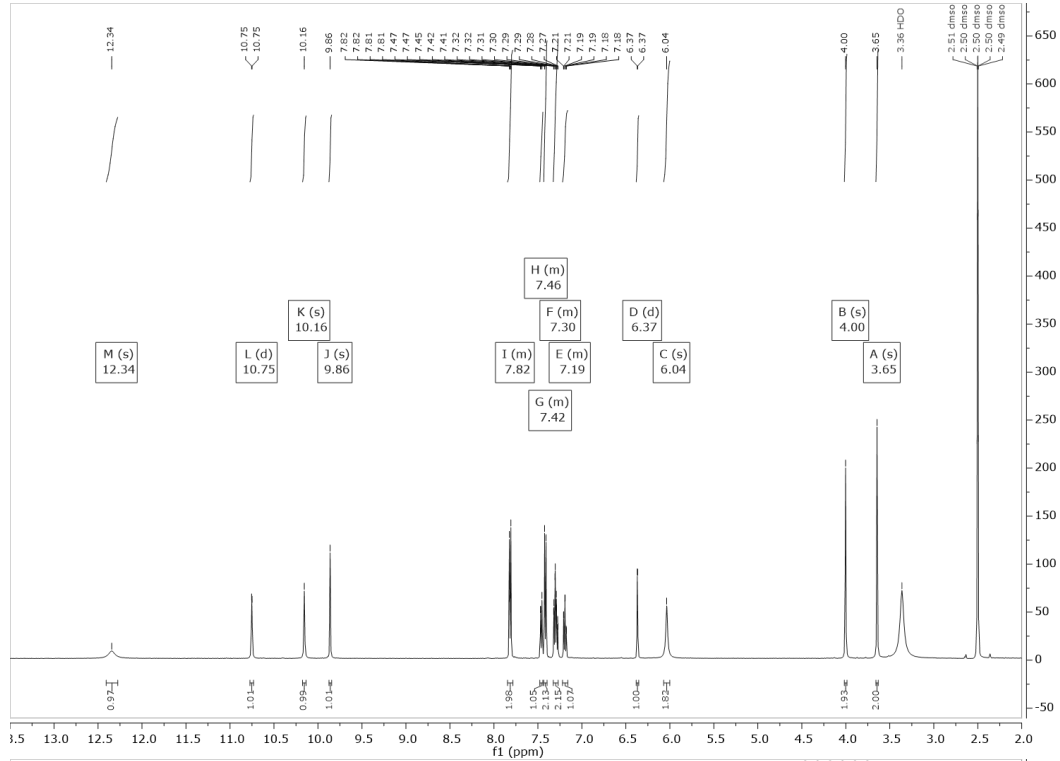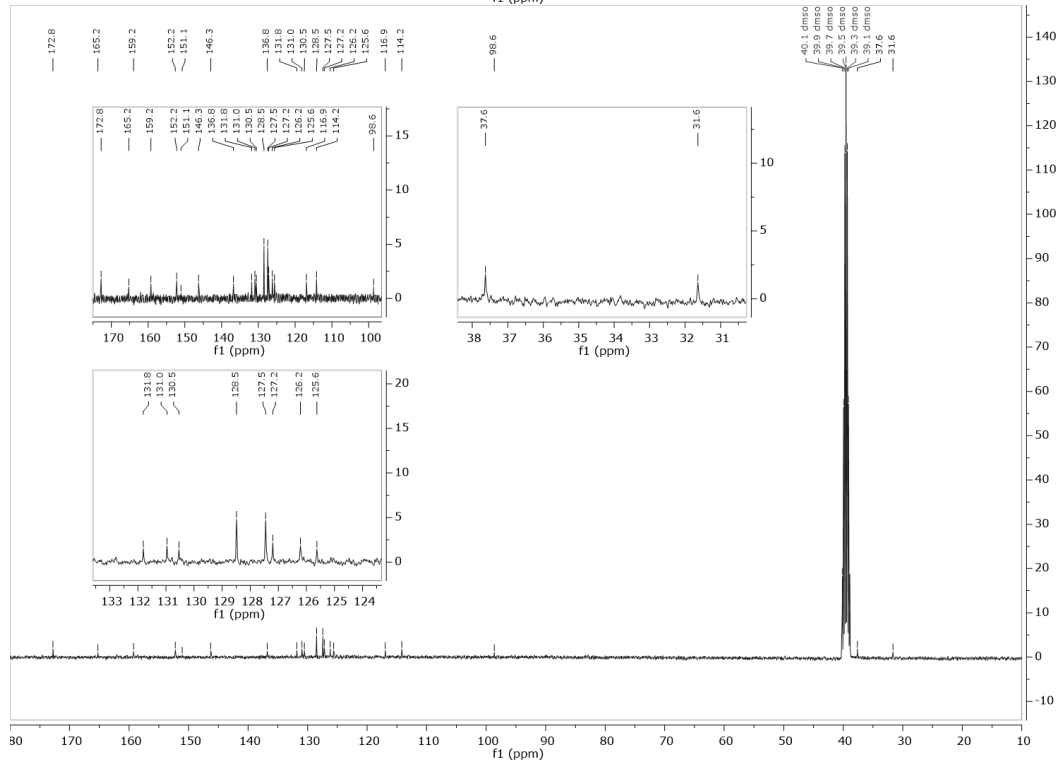

Cal 20190827  
mel\_MV80 (0.019) Is (1.00,1.00) C22H20N5O4

1: TOF MS ES+  
7.60e12

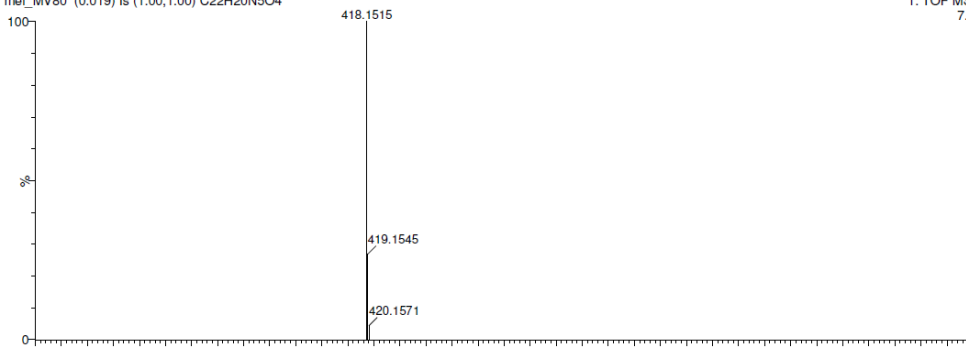

mel\_MV80 274 (1.157) Cm (260:274)

1: TOF MS ES+  
3.23e4

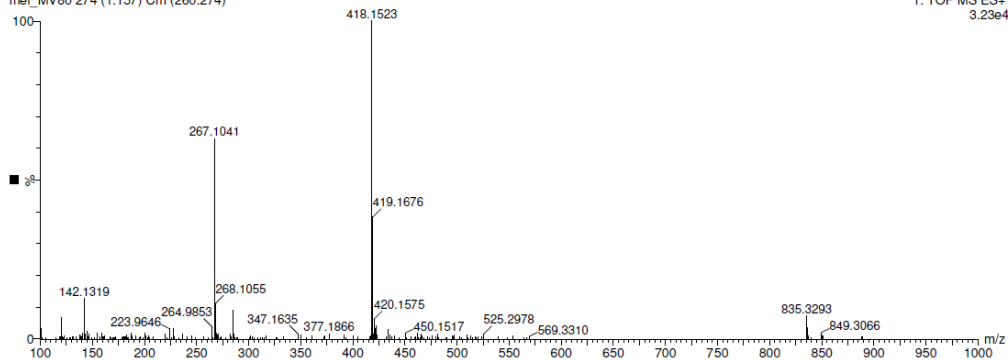

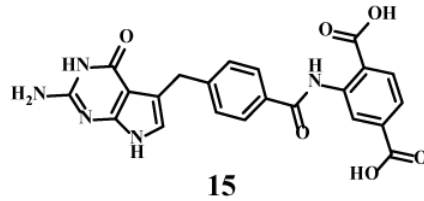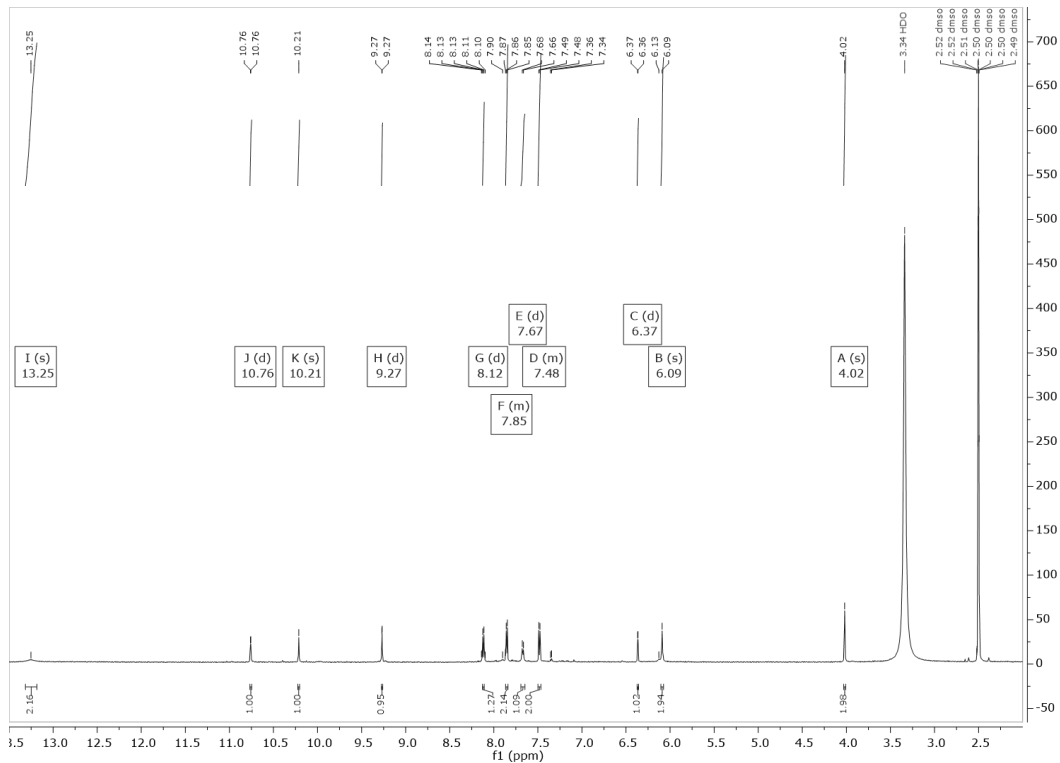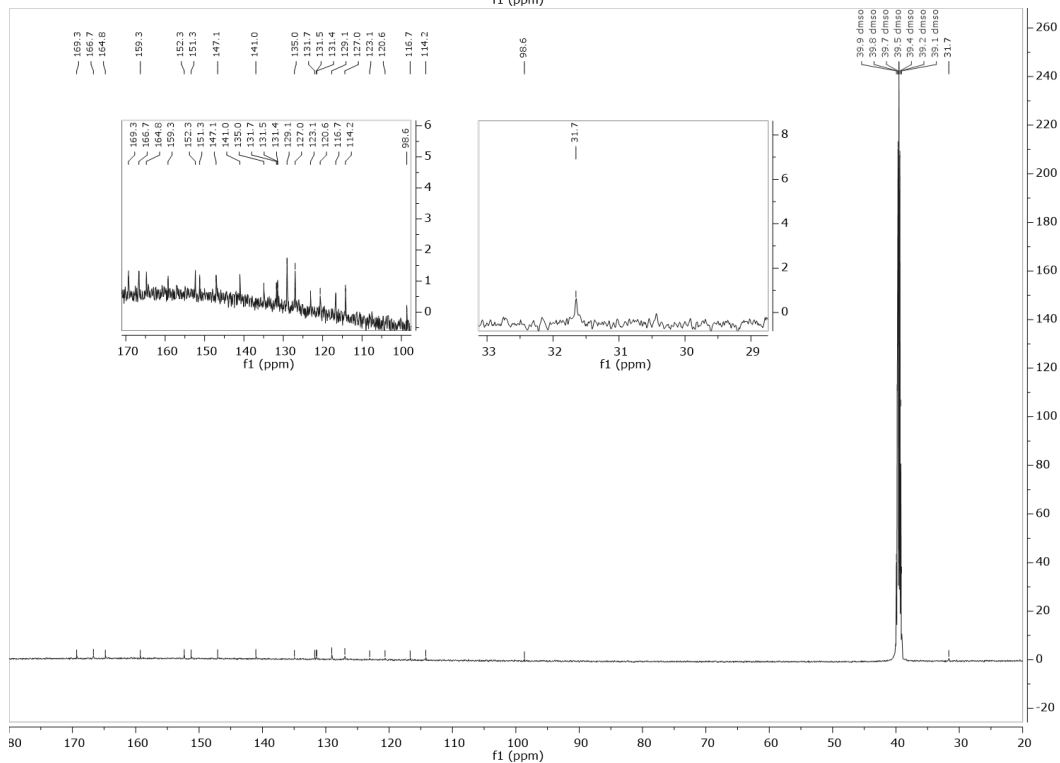

Cal 20190827  
mel\_MV294 (0.019) Is (1.00,1.00) C22H18N5O6

1: TOF MS ES+  
7.57e12

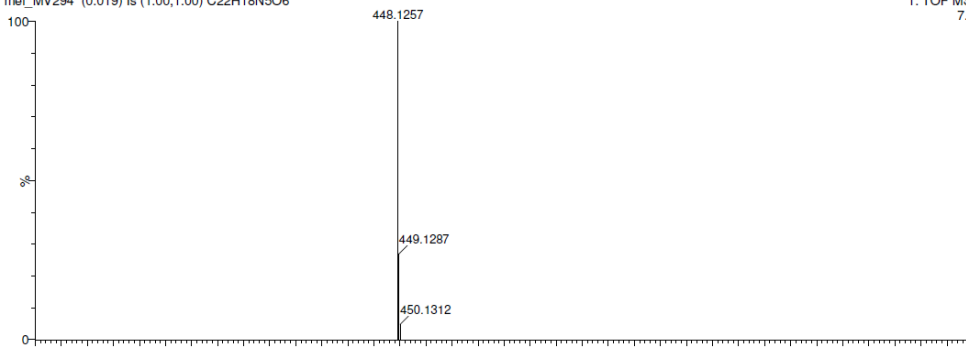

mel\_MV294 299 (1.261) Cm (296:300)

1: TOF MS ES+  
7.36e3

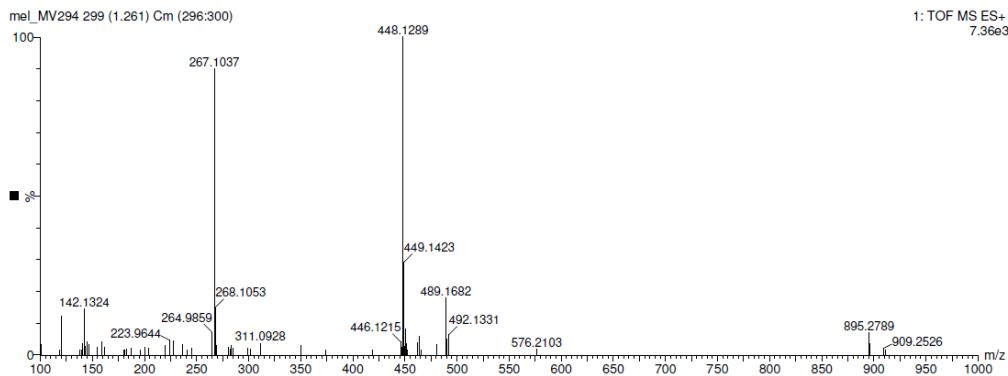



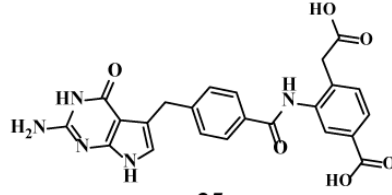

25

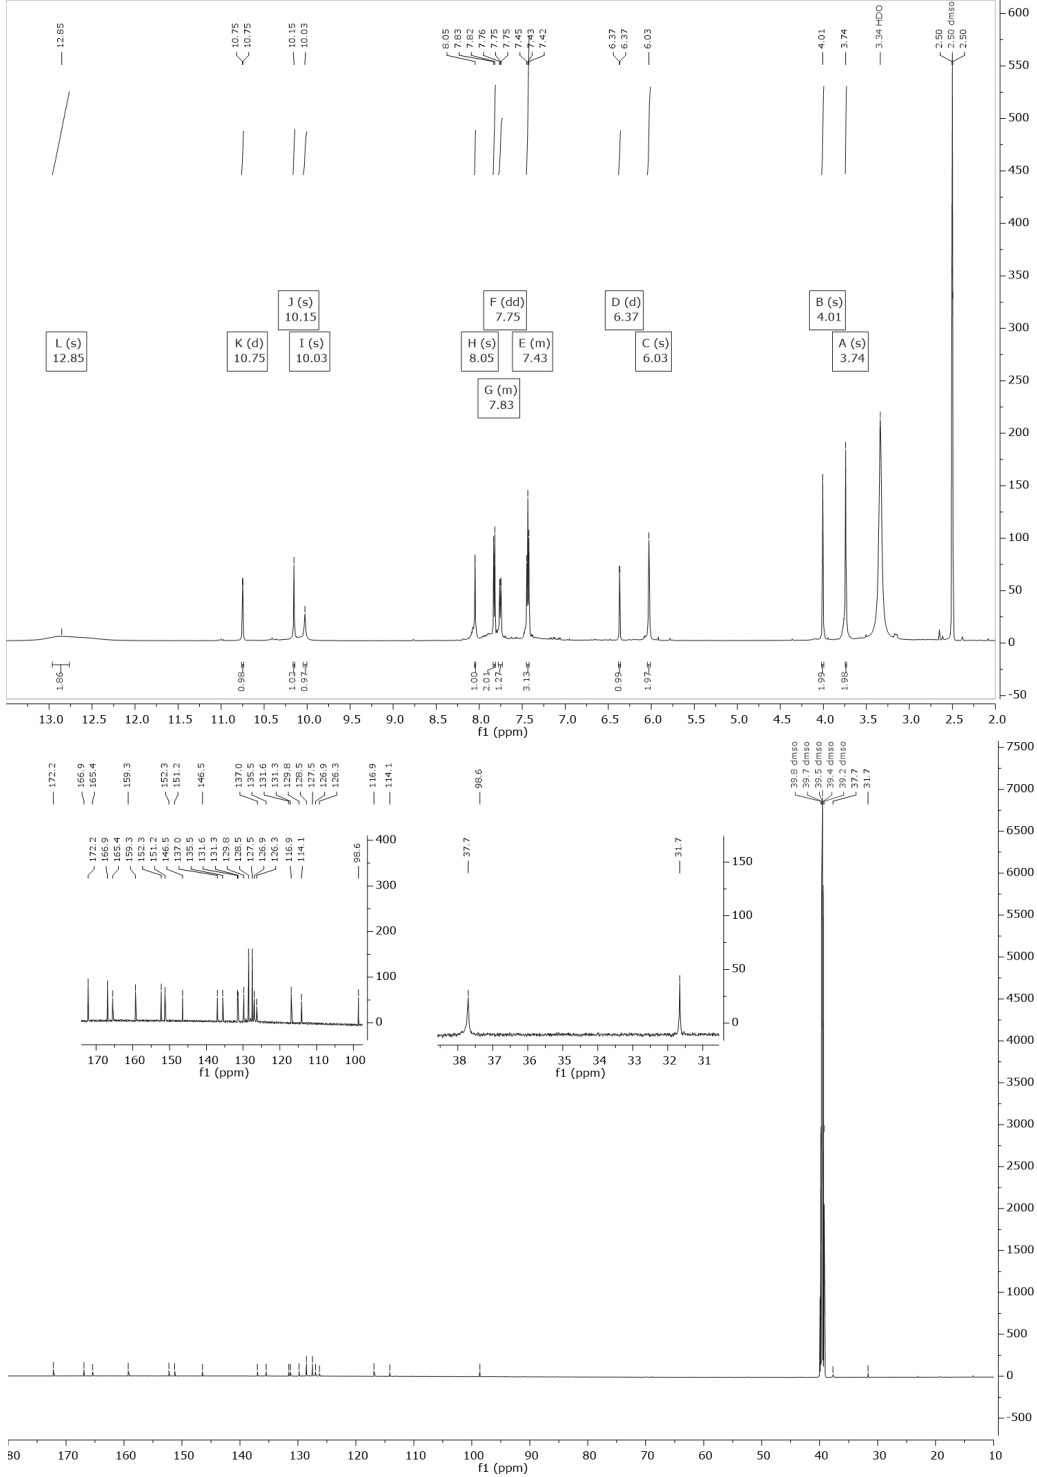

Cal 20190827  
mel\_MV679 (0.019) Is (1.00,1.00) C23H20N5O6

1: TOF MS ES+  
7.48e12

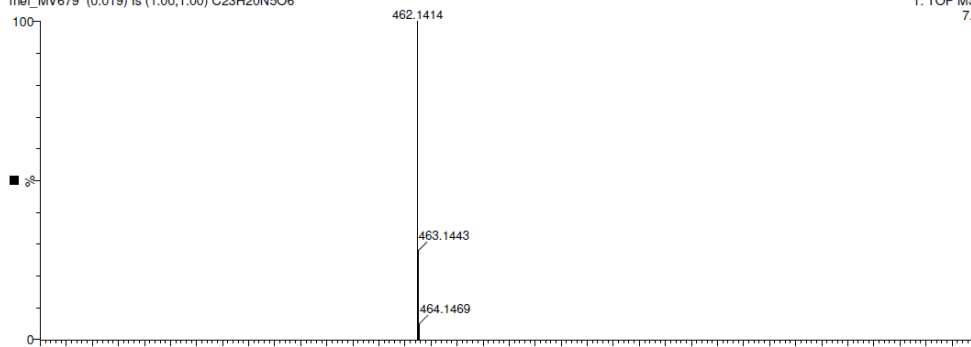

mel\_MV679 288 (1.215) Cm (288:305)

1: TOF MS ES+  
2.52e4

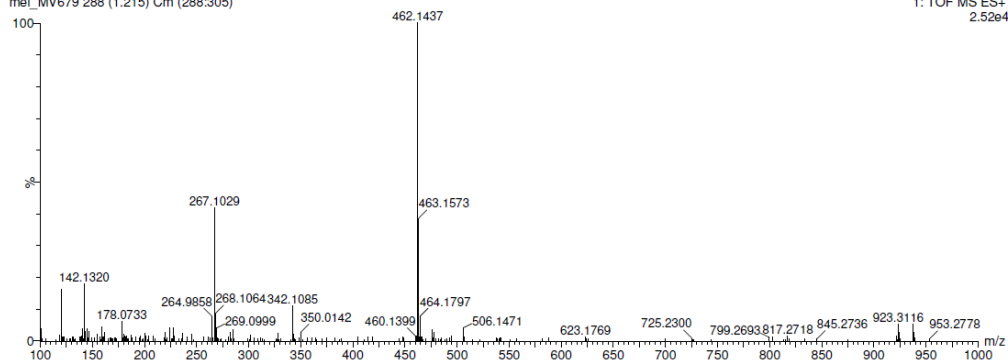

**3. Table S1. IC<sub>50</sub> (μM) for ChTS and human TS<sup>a</sup>**

| Compound       | ChTS IC <sub>50</sub> | hTS IC <sub>50</sub> | Fold-Change |
|----------------|-----------------------|----------------------|-------------|
| 1 <sup>b</sup> | 0.38 ± 0.04           | 1.8 ± 0.5            | 5           |
| 2              | 20 ± 12               | 1.3 ± 0.2            | 15          |
| 3              | 96 ± 10               | 0.13 ± 0.03          | 738         |
| 4              | >100                  | 0.47 ± 0.06          | 213         |
| 5              | 16 ± 1                | 1.7 ± 0.2            | 9           |
| 6              | 114 ± 21              | 3.5 ± 0.5            | 33          |
| 7              | 159 ± 19              | 1.2 ± 0.2            | 133         |
| 8              | 123 ± 7               | 1.3 ± 0.1            | 95          |
| 9              | 210 ± 81              | ND                   | ~~          |
| 10             | >100                  | 7.3 ± 0.9            | 14          |
| 11             | 119 ± 13              | 1.8 ± 0.2            | 66          |
| 12             | >500                  | 98 ± 29              | 5           |
| 13             | 63 ± 8                | 3.8 ± 0.5            | 17          |
| 14             | 28 ± 6                | 3.2 ± 0.4            | 9           |
| 15             | 18 ± 2                | 0.26 ± 0.02          | 69          |
| 16             | 50 ± 8                | 0.6 ± 0.1            | 83          |
| 17             | 11 ± 1                | 0.46 ± 0.09          | 24          |
| 18             | 181 ± 32              | 2.8 ± 0.5            | 65          |
| 19             | 68 ± 12               | 0.39 ± 0.07          | 174         |
| 20             | 20 ± 4                | 1.0 ± 0.3            | 20          |
| 21             | 222 ± 77              | 6 ± 2                | 37          |
| 22             | >100                  | 0.7 ± 0.2            | 143         |
| 23             | 11 ± 1                | 0.8 ± 0.1            | 14          |
| 24             | 9.1 ± 0.7             | 2.2 ± 0.2            | 4           |
| 25             | 10 ± 1                | 0.26 ± 0.02          | 38          |
| 26             | 97 ± 44               | ND                   | ~~          |
| 27             | >500                  | 52 ± 14              | 10          |

<sup>a</sup> SD from triplicate measurement. <sup>b</sup> Results from reference [6]

**4. Table S2. X-Ray crystallography data collection and refinement statistics**

|                                      | mhTS:5                                                                        | mhTS:14                                                                          | mhTS:15                                                                         | mhTS:23                                                                          | ChTS-DHFR:2                                                                        | ChTS-DHFR:5                                                                        | ChTS-DHFR:6                                                                        | ChTS-DHFR:11                                                                       |
|--------------------------------------|-------------------------------------------------------------------------------|----------------------------------------------------------------------------------|---------------------------------------------------------------------------------|----------------------------------------------------------------------------------|------------------------------------------------------------------------------------|------------------------------------------------------------------------------------|------------------------------------------------------------------------------------|------------------------------------------------------------------------------------|
| PDB Code                             | 6PF3                                                                          | 6PF4                                                                             | 6PF5                                                                            | 6PF6                                                                             | 6PF7                                                                               | 6PF8                                                                               | 6PF9                                                                               | 6PFA                                                                               |
| X-Ray Source                         | APS 24ID-E                                                                    | APS 24ID-E                                                                       | APS 24ID-E                                                                      | APS 24ID-E                                                                       | APS 24ID-E                                                                         | APS 24ID-E                                                                         | APS 24ID-C                                                                         | APS 24ID-E                                                                         |
| Wavelength (Å)                       | 0.979180                                                                      | 0.979180                                                                         | 0.979180                                                                        | 0.979180                                                                         | 0.979180                                                                           | 0.979180                                                                           | 0.979300                                                                           | 0.979180                                                                           |
| Space group                          | P21 21 21                                                                     | C 1 2 1                                                                          | P41 21 2                                                                        | C 1 2 1                                                                          | C 1 2 1                                                                            | C 1 2 1                                                                            | C 1 2 1                                                                            | C 1 2 1                                                                            |
| Unit-cell parameters (Å)             | a=92.41,<br>b=96.78,<br>c=136.20<br>$\alpha=90$ , $\beta=90$ ,<br>$\gamma=90$ | a=89.09,<br>b=89.30,<br>c=163.47<br>$\alpha=90$ , $\beta=89.98$ ,<br>$\gamma=90$ | a=151.59,<br>b=151.59,<br>c=106.73<br>$\alpha=90$ , $\beta=90$ ,<br>$\gamma=90$ | a=85.03,<br>b=85.10,<br>c=175.73<br>$\alpha=90$ , $\beta=90.12$ ,<br>$\gamma=90$ | a=214.74,<br>b=115.72,<br>c=220.04<br>$\alpha=90$ , $\beta=94.65$ ,<br>$\gamma=90$ | a=214.22,<br>b=116.47,<br>c=221.39<br>$\alpha=90$ , $\beta=94.87$ ,<br>$\gamma=90$ | a=213.60,<br>b=116.10,<br>c=221.32<br>$\alpha=90$ , $\beta=94.74$ ,<br>$\gamma=90$ | a=213.19,<br>b=117.36,<br>c=222.89<br>$\alpha=90$ , $\beta=95.70$ ,<br>$\gamma=90$ |
| Resolution range (Å)                 | 50.0-2.84<br>(3.02-2.84)                                                      | 50.0-2.39<br>(2.54-2.39)                                                         | 50.0-2.50 (2.65-<br>2.50)                                                       | 50.0-2.39<br>(2.53-2.39)                                                         | 50.0-2.80 (2.96-<br>2.80)                                                          | 50.0-2.89 (3.06-<br>2.89)                                                          | 50.0-3.09 (3.28-<br>3.09)                                                          | 50.0-2.79 (2.95-<br>2.79)                                                          |
| Completeness (%)                     | 97.6 (86.0)                                                                   | 98.9 (95.1)                                                                      | 99.8 (98.8)                                                                     | 98.7 (93.2)                                                                      | 99.6 (98.4)                                                                        | 99.2 (95.5)                                                                        | 97.8 (91.9)                                                                        | 99.2 (96.3)                                                                        |
| R <sub>sym</sub> (%)                 | 0.176 (0.737)                                                                 | 0.072 (0.941)                                                                    | 0.181 (4.015)                                                                   | 0.074 (0.777)                                                                    | 0.112 (1.116)                                                                      | 0.183 (1.132)                                                                      | 0.280 (1.954)                                                                      | 0.106 (0.845)                                                                      |
| CC(1/2) (%)                          | 99.5 (92.8)                                                                   | 99.8 (82.8)                                                                      | 99.9 (58.0)                                                                     | 99.8 (78.0)                                                                      | 99.6 (66.6)                                                                        | 98.0 (78.2)                                                                        | 97.8 (44.2)                                                                        | 99.6 (78.2)                                                                        |
| Avg. I/ $\sigma$                     | 10.29 (3.20)                                                                  | 12.95 (1.46)                                                                     | 17.60 (1.07)                                                                    | 13.25 (1.98)                                                                     | 11.64 (1.26)                                                                       | 5.07 (1.03)                                                                        | 4.81 (0.74)                                                                        | 10.30 (1.26)                                                                       |
| Redundancy                           | 7.0 (6.0)                                                                     | 3.7 (3.6)                                                                        | 26.5 (26.2)                                                                     | 3.6 (3.5)                                                                        | 3.8 (3.8)                                                                          | 3.8 (3.7)                                                                          | 3.9 (3.8)                                                                          | 3.7 (3.6)                                                                          |
| No. Reflections (Unique Reflections) | 199233<br>(28415)                                                             | 186029<br>(50336)                                                                | 1162478<br>(43817)                                                              | 179082<br>(49247)                                                                | 499613<br>(132650)                                                                 | 455977<br>(120860)                                                                 | 375681<br>(97343)                                                                  | 504700<br>(135631)                                                                 |
| R <sub>free</sub> /R <sub>work</sub> | 0.2537/0.2395                                                                 | 0.2888/0.2583                                                                    | 0.2644/0.2266                                                                   | 0.2582/0.2271                                                                    | 0.2534/0.2227                                                                      | 0.2418/0.2142                                                                      | 0.2707/0.2373                                                                      | 0.2490/0.2222                                                                      |
| No. of Atoms                         | 9198                                                                          | 9080                                                                             | 9001                                                                            | 9170                                                                             | 21040                                                                              | 20984                                                                              | 20535                                                                              | 21045                                                                              |
| Protein                              | 8968                                                                          | 8834                                                                             | 8833                                                                            | 8836                                                                             | 20221                                                                              | 20282                                                                              | 19865                                                                              | 20254                                                                              |
| Ligands                              | 204                                                                           | 204                                                                              | 146                                                                             | 212                                                                              | 660                                                                                | 665                                                                                | 670                                                                                | 665                                                                                |
| Solvent                              | 26                                                                            | 42                                                                               | 22                                                                              | 122                                                                              | 139                                                                                | 12                                                                                 |                                                                                    | 101                                                                                |
| R.M.S. deviation                     |                                                                               |                                                                                  |                                                                                 |                                                                                  |                                                                                    |                                                                                    |                                                                                    |                                                                                    |
| Bond lengths (Å)                     | 0.003                                                                         | 0.002                                                                            | 0.002                                                                           | 0.002                                                                            | 0.002                                                                              | 0.002                                                                              | 0.002                                                                              | 0.002                                                                              |
| Bond angles (°)                      | 0.615                                                                         | 0.487                                                                            | 0.502                                                                           | 0.575                                                                            | 0.517                                                                              | 0.468                                                                              | 0.483                                                                              | 0.494                                                                              |
| Avg. B-factor                        | 35.70                                                                         | 62.91                                                                            | 71.09                                                                           | 48.77                                                                            | 80.04                                                                              | 82.31                                                                              | 98.82                                                                              | 78.42                                                                              |
| Protein                              | 36.72                                                                         | 62.29                                                                            | 70.94                                                                           | 50.07                                                                            | 74.87                                                                              | 78.96                                                                              | 103.96                                                                             | 73.71                                                                              |
| Ligand                               | 35.24                                                                         | 63.80                                                                            | 72.41                                                                           | 48.36                                                                            | 81.75                                                                              | 89.97                                                                              | 89.97                                                                              | 81.25                                                                              |
| Solvent                              | 35.26                                                                         | 58.23                                                                            | 63.73                                                                           | 46.85                                                                            | 98.30                                                                              | 53.31                                                                              |                                                                                    | 57.35                                                                              |
| Ramachandran Plot                    | 95.12                                                                         | 95.23                                                                            | 96.54                                                                           | 95.94                                                                            | 95.27                                                                              | 93.82                                                                              | 92.90                                                                              | 94.26                                                                              |
| Favored region (%)                   | 4.88                                                                          | 4.77                                                                             | 3.46                                                                            | 4.06                                                                             | 4.73                                                                               | 6.18                                                                               | 7.10                                                                               | 5.74                                                                               |
| Allowed region (%)                   | 0.00                                                                          | 0.00                                                                             | 0.00                                                                            | 0.00                                                                             | 0.00                                                                               | 0.00                                                                               | 0.00                                                                               | 0.00                                                                               |
| Outliers (%)                         |                                                                               |                                                                                  |                                                                                 |                                                                                  |                                                                                    |                                                                                    |                                                                                    |                                                                                    |

**Table S2. Continued**

|                                         | <i>ChTS-DHFR:14</i>                                          | <i>ChTS-DHFR:15</i>                                         | <i>ChTS-DHFR:16</i>                                          | <i>ChTS-DHFR:17</i>                                          | <i>ChTS-DHFR:20</i>                                          | <i>ChTS-DHFR:23</i>                                          | <i>ChTS-DHFR:24</i>                                          | <i>ChTS-DHFR:25</i>                                          |
|-----------------------------------------|--------------------------------------------------------------|-------------------------------------------------------------|--------------------------------------------------------------|--------------------------------------------------------------|--------------------------------------------------------------|--------------------------------------------------------------|--------------------------------------------------------------|--------------------------------------------------------------|
| PDB Code                                | 6PFB                                                         | 6PFC                                                        | 6PFD                                                         | 6PFE                                                         | 6PFF                                                         | 6PFG                                                         | 6PFH                                                         | 6PFI                                                         |
| X-Ray Source                            | APS 24ID-E                                                   | APS 24ID-E                                                  | APS 24ID-C                                                   | APS 24ID-E                                                   | APS 24ID-E                                                   | APS 24ID-E                                                   | NSLS-II 17ID-FMX                                             | APS 24ID-C                                                   |
| Wavelength (Å)                          | 0.979180                                                     | 0.979180                                                    | 0.979200                                                     | 0.979180                                                     | 0.979180                                                     | 0.979180                                                     | 0.979303                                                     | 0.979200                                                     |
| Space group                             | C 1 2 1                                                      | C 1 2 1                                                     | C 1 2 1                                                      | C 1 2 1                                                      | C 1 2 1                                                      | C 1 2 1                                                      | C 1 2 1                                                      | C 1 2 1                                                      |
| Unit-cell parameters (Å)                | a=214.82,<br>b=117.55,<br>c=222.99<br>α=90, β=95.71,<br>γ=90 | a=212.54<br>b=113.46,<br>c=220.67<br>α=90, β=94.33,<br>γ=90 | a=213.62,<br>b=116.56,<br>c=220.85<br>α=90, β=95.00,<br>γ=90 | a=212.75,<br>b=116.81,<br>c=220.45<br>α=90, β=95.37,<br>γ=90 | a=212.21,<br>b=115.95,<br>c=220.50<br>α=90, β=94.92,<br>γ=90 | a=215.10,<br>b=117.10,<br>c=221.80<br>α=90, β=95.30,<br>γ=90 | a=214.23,<br>b=117.07,<br>c=221.38<br>α=90, β=95.53,<br>γ=90 | a=214.74,<br>b=116.65,<br>c=222.21<br>α=90, β=95.30,<br>γ=90 |
| Resolution range (Å)                    | 50.0-2.53<br>(2.69-2.53)                                     | 50.0-3.32 (3.52-<br>3.32)                                   | 50.0-2.80 (2.97-<br>2.80)                                    | 50.0-2.98 (3.16-<br>2.98)                                    | 50.0-2.71 (2.87-<br>2.71)                                    | 50.0-2.69 (2.85-<br>2.69)                                    | 30.0-2.94 (3.12-<br>2.94)                                    | 50.0-2.89 (3.06-<br>2.89)                                    |
| Completeness (%)                        | 98.5 (92.9)                                                  | 95.9 (81.6)                                                 | 95.5 (84.1)                                                  | 98.2 (89.3)                                                  | 99.0 (97.2)                                                  | 98.7 (94.2)                                                  | 99.3 (96.2)                                                  | 98.2 (95.1)                                                  |
| R <sub>sym</sub> (%)                    | 0.125 (0.605)                                                | 0.163 (0.714)                                               | 0.254 (1.629)                                                | 0.128 (0.659)                                                | 0.077 (0.456)                                                | 0.132 (0.966)                                                | 0.152 (0.930)                                                | 0.255 (1.324)                                                |
| CC(1/2) (%)                             | 98.9 (79.3)                                                  | 98.7 (81.6)                                                 | 98.4 (50.0)                                                  | 99.3 (82.9)                                                  | 99.7 (88.8)                                                  | 99.2 (73.3)                                                  | 99.6 (79.1)                                                  | 98.5 (67.1)                                                  |
| Avg. I/σ                                | 7.49 (1.75)                                                  | 9.04 (1.86)                                                 | 5.78 (0.83)                                                  | 9.62 (1.90)                                                  | 14.06 (2.45)                                                 | 8.35 (1.52)                                                  | 10.51 (1.76)                                                 | 5.18 (1.16)                                                  |
| Redundancy                              | 3.6 (3.5)                                                    | 3.7 (3.1)                                                   | 5.9 (5.3)                                                    | 3.7 (3.6)                                                    | 3.7 (3.6)                                                    | 3.7 (3.7)                                                    | 7.0 (7.0)                                                    | 6.9 (7.0)                                                    |
| No. Reflections<br>(Unique Reflections) | 659219<br>(180633)                                           | 277121<br>(75886)                                           | 745530<br>(124669)                                           | 402915<br>(108730)                                           | 538269<br>(146236)                                           | 553601<br>(150400)                                           | 801037<br>(115109)                                           | 827894<br>(119315)                                           |
| R <sub>free</sub> /R <sub>work</sub>    | 0.2260/0.2027                                                | 0.2615/0.2217                                               | 0.2572/0.2274                                                | 0.2393/0.2100                                                | 0.2310/0.2023                                                | 0.2396/0.2138                                                | 0.2191/0.1899                                                | 0.2519/0.2129                                                |
| No. of Atoms                            | 21656                                                        | 20790                                                       | 20966                                                        | 20924                                                        | 21541                                                        | 21366                                                        | 20968                                                        | 20959                                                        |
| Protein                                 | 20379                                                        | 20115                                                       | 20256                                                        | 20215                                                        | 20374                                                        | 20427                                                        | 20293                                                        | 20253                                                        |
| Ligands                                 | 665                                                          | 675                                                         | 670                                                          | 670                                                          | 675                                                          | 675                                                          | 675                                                          | 680                                                          |
| Solvent                                 | 612                                                          |                                                             | 40                                                           | 14                                                           | 462                                                          | 264                                                          |                                                              | 26                                                           |
| R.M.S. deviation                        |                                                              |                                                             |                                                              |                                                              |                                                              |                                                              |                                                              |                                                              |
| Bond lengths (Å)                        | 0.002                                                        | 0.002                                                       | 0.002                                                        | 0.002                                                        | 0.002                                                        | 0.002                                                        | 0.002                                                        | 0.002                                                        |
| Bond angles (°)                         | 0.531                                                        | 0.505                                                       | 0.552                                                        | 0.534                                                        | 0.533                                                        | 0.481                                                        | 0.504                                                        | 0.505                                                        |
| Avg. B-factor                           | 52.55                                                        | 93.14                                                       | 71.58                                                        | 71.45                                                        | 63.46                                                        | 59.69                                                        | 73.64                                                        | 74.78                                                        |
| Protein                                 | 49.95                                                        | 78.43                                                       | 70.50                                                        | 63.51                                                        | 57.31                                                        | 58.46                                                        | 69.62                                                        | 72.01                                                        |
| Ligand                                  | 53.95                                                        | 96.82                                                       | 72.71                                                        | 74.53                                                        | 65.57                                                        | 60.56                                                        | 74.65                                                        | 76.45                                                        |
| Solvent                                 | 45.49                                                        |                                                             | 54.50                                                        | 35.73                                                        | 47.14                                                        | 48.50                                                        |                                                              | 55.13                                                        |
| Ramachandran Plot                       |                                                              |                                                             |                                                              |                                                              |                                                              |                                                              |                                                              |                                                              |
| Favored region (%)                      | 95.85                                                        | 94.18                                                       | 94.31                                                        | 94.10                                                        | 94.7                                                         | 95.70                                                        | 94.95                                                        | 94.39                                                        |
| Allowed region (%)                      | 4.15                                                         | 5.82                                                        | 5.69                                                         | 5.90                                                         | 5.30                                                         | 4.30                                                         | 5.01                                                         | 5.61                                                         |
| Outliers (%)                            | 0.00                                                         | 0.00                                                        | 0.00                                                         | 0.00                                                         | 0.00                                                         | 0.00                                                         | 0.00                                                         | 0.00                                                         |

Values in parentheses are from highest resolution shell. One crystal was used for the data set.



## 6. X-ray crystallography

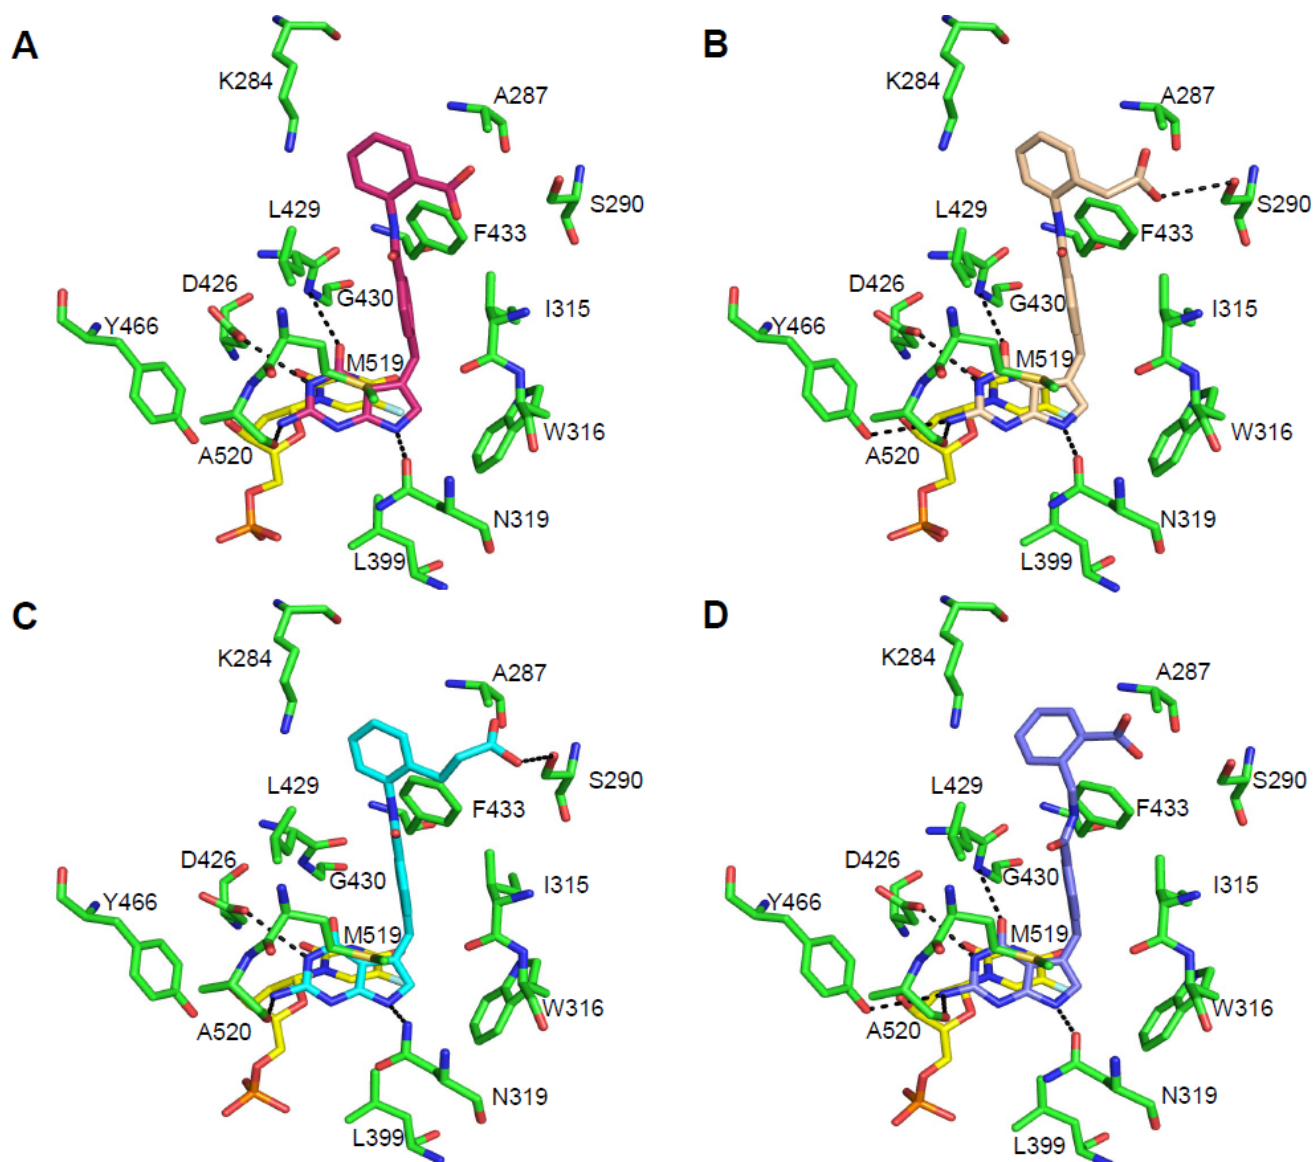

**Figure S2.** Active site residues of *ChTS* (green) (PDB: 6PF7, 6PF9, 6PFB, and 6PFA) A. *ChTS* complexed with **2** (warm pink) and FdUMP (yellow). B. *ChTS* complexed with **5** (wheat) and FdUMP (yellow). C. *ChTS* complexed with **6** (cyan) and FdUMP (yellow). D. *ChTS* complexed with **11** (slate) and FdUMP (yellow). Hydrogen bonding interactions with active site residues designated by black dotted lines.

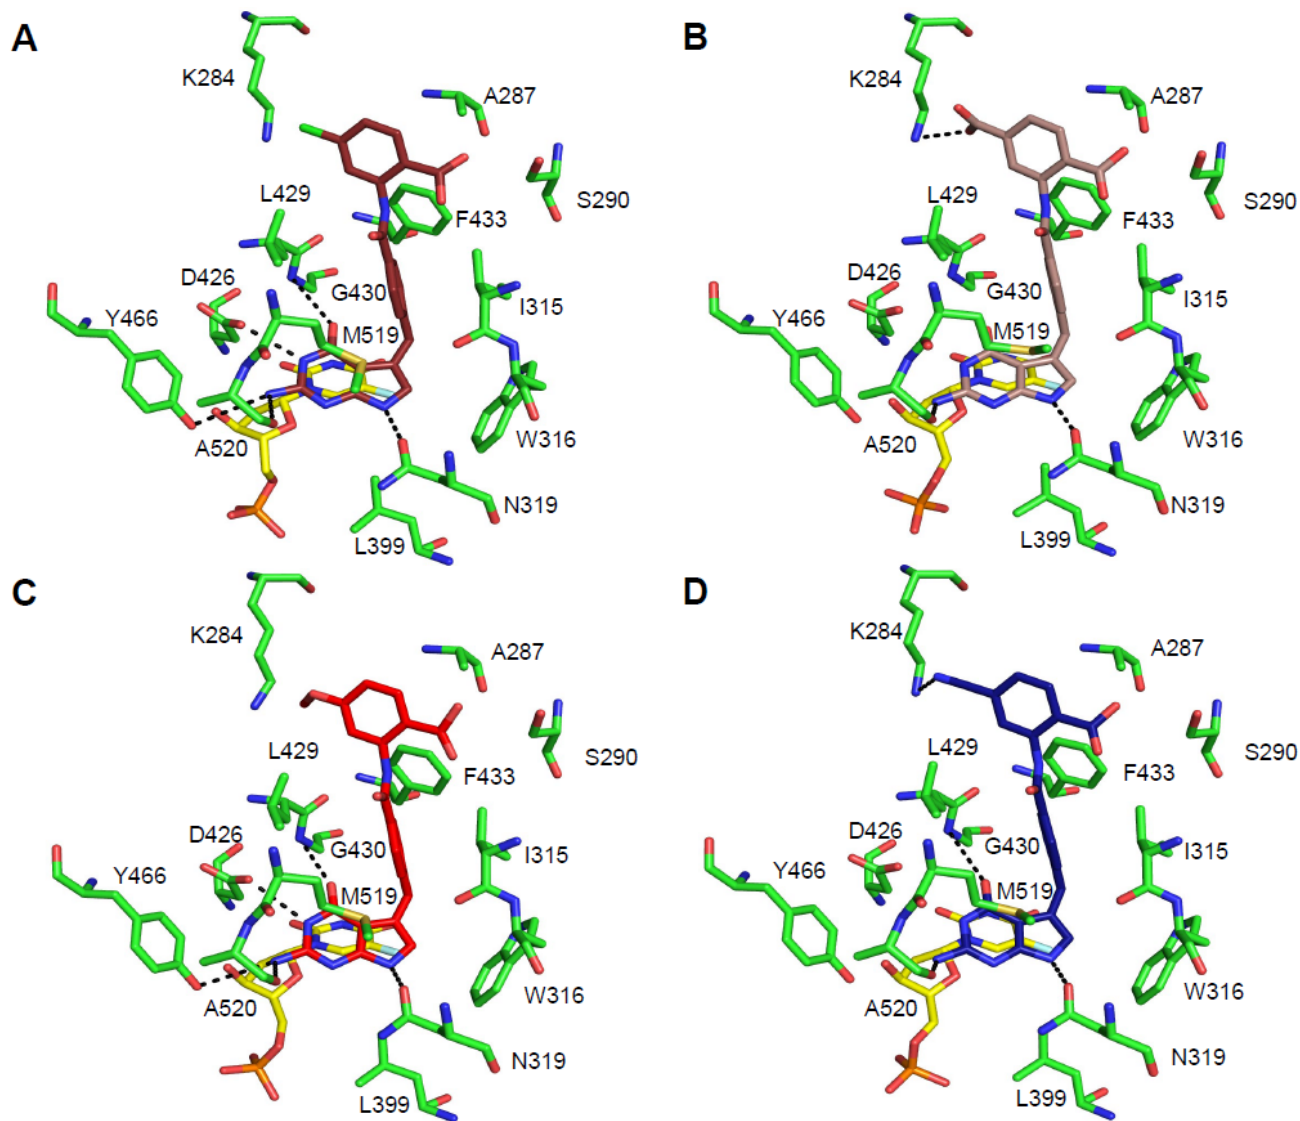

**Figure S3.** Active site residues of *ChTS* (green) (PDB: 6PF8, 6PFD, 6PFE, and 6PFF). A. *ChTS* complexed with **14** (red brick) and FdUMP (yellow). B. *ChTS* complexed with **15** (light brown) and FdUMP (yellow). C. *ChTS* complexed with **16** (red) and FdUMP (yellow). D. *ChTS* complexed with **17** (navy) and FdUMP (yellow). Hydrogen bonding interactions with active site residues designated by black dotted lines.



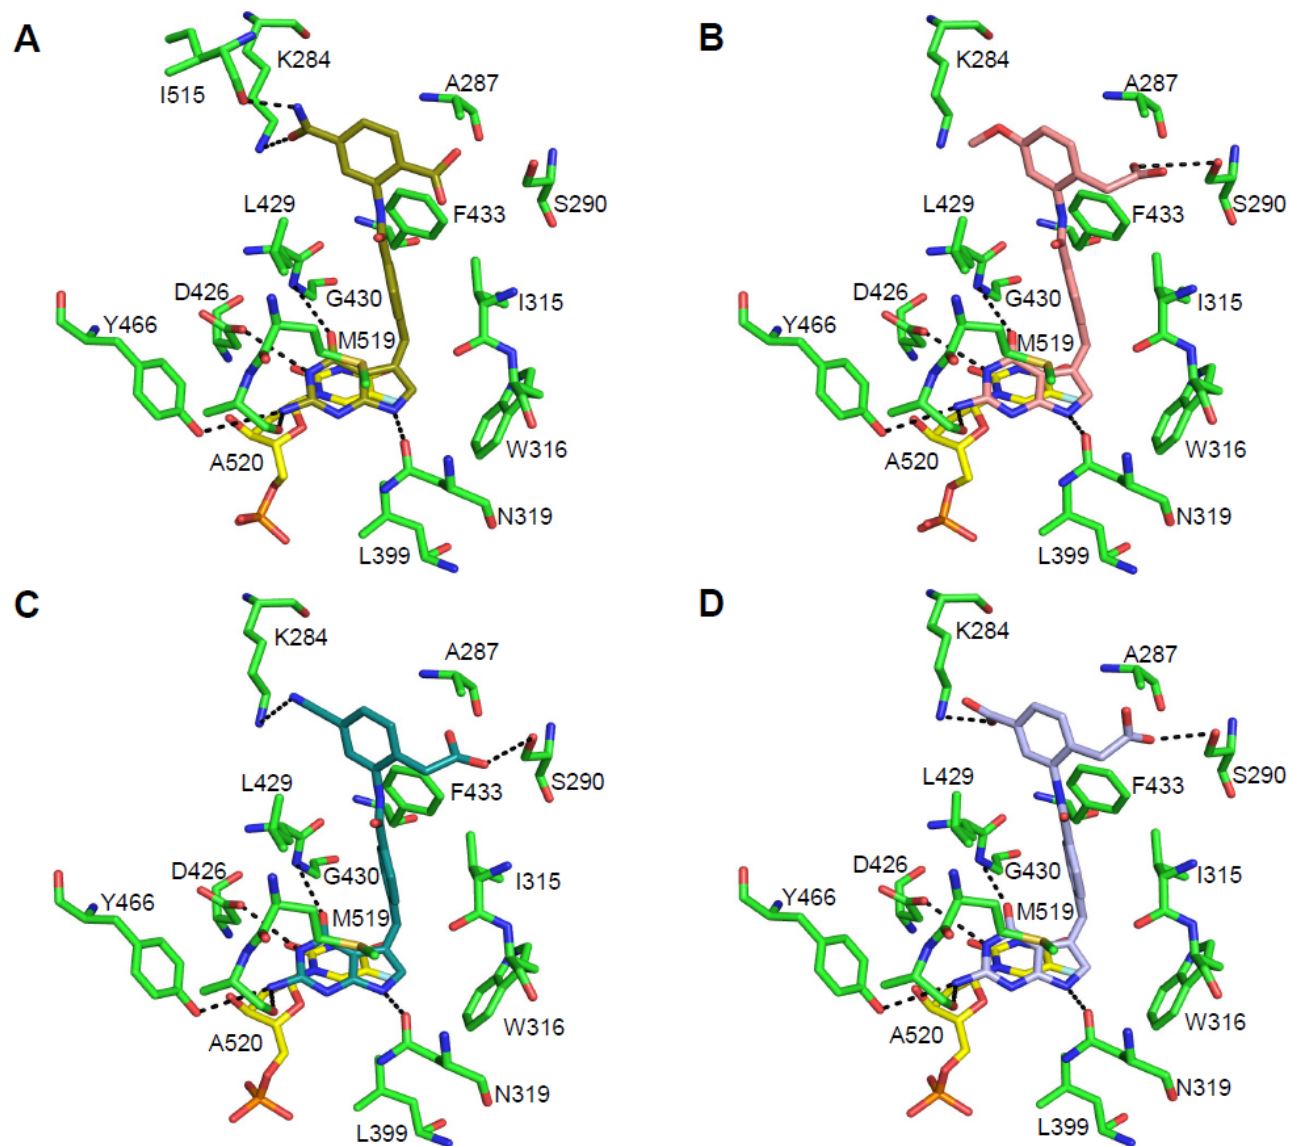

**Figure S4.** Active site residues of *ChTS* (green) (PDB: 6PFG, 6PFC, 6PFH, and 6PFI). A. *ChTS* complexed with **20** (olive) and FdUMP (yellow). B. *ChTS* complexed with **23** (salmon) and FdUMP (yellow). C. *ChTS* complexed with **24** (dark teal) and FdUMP (yellow). D. *ChTS* complexed with **25** and FdUMP (yellow). Hydrogen bonding interactions with active site residues designated by black dotted lines.

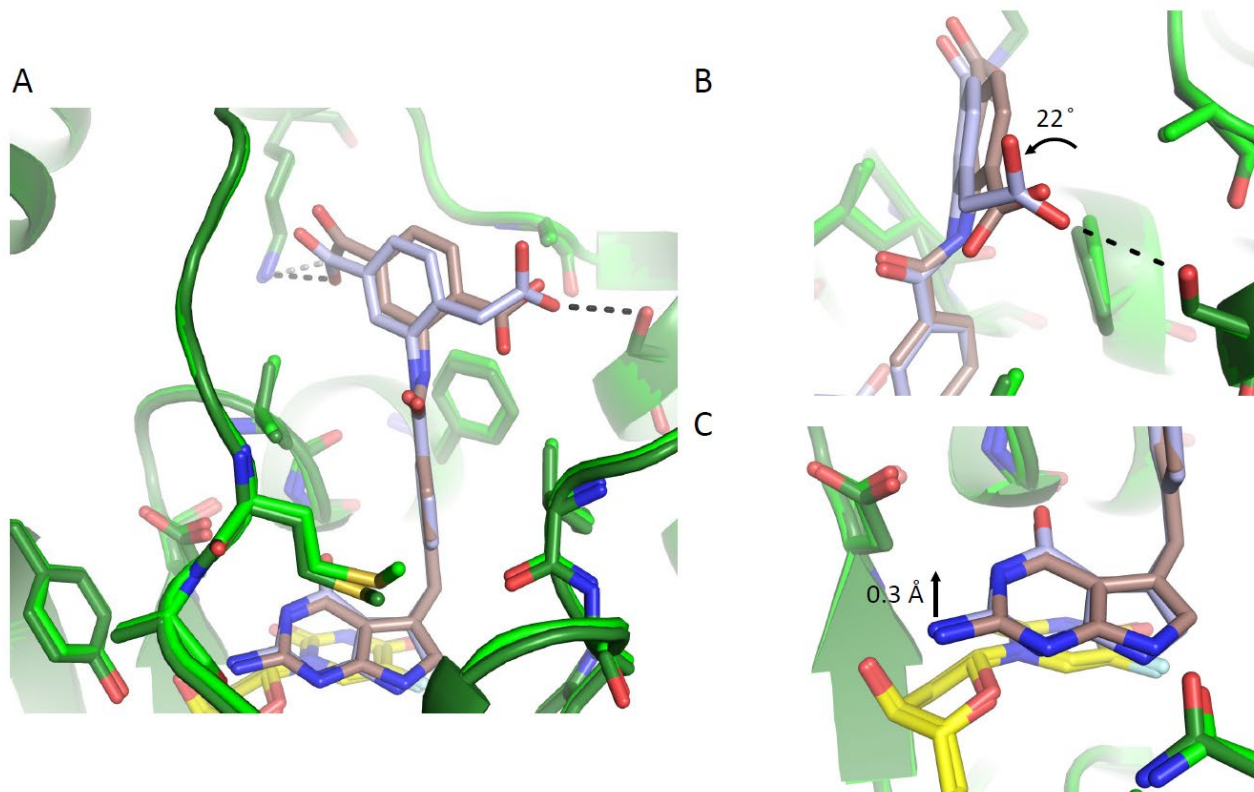

**Figure S5.** Comparison of *ChTS* bound to **15** (green/light brown) and *ChTS* bound to **25** (dark green/lavender) with FdUMP (yellow). (PDB: 6PFD and 6PFI) A. Comparison of **15** and **25** bound in *ChTS* active site, hydrogen bonds to **15** gray dotted line and to **25** black dotted line. B. Zoom in view rotation of **25** 2-phenylacetic acid moiety with respect to **15** benzoic acid moiety. C. Zoom in view of shift of pyrrolo[2,3-d]pyrimidine moiety of **15** and **25**.

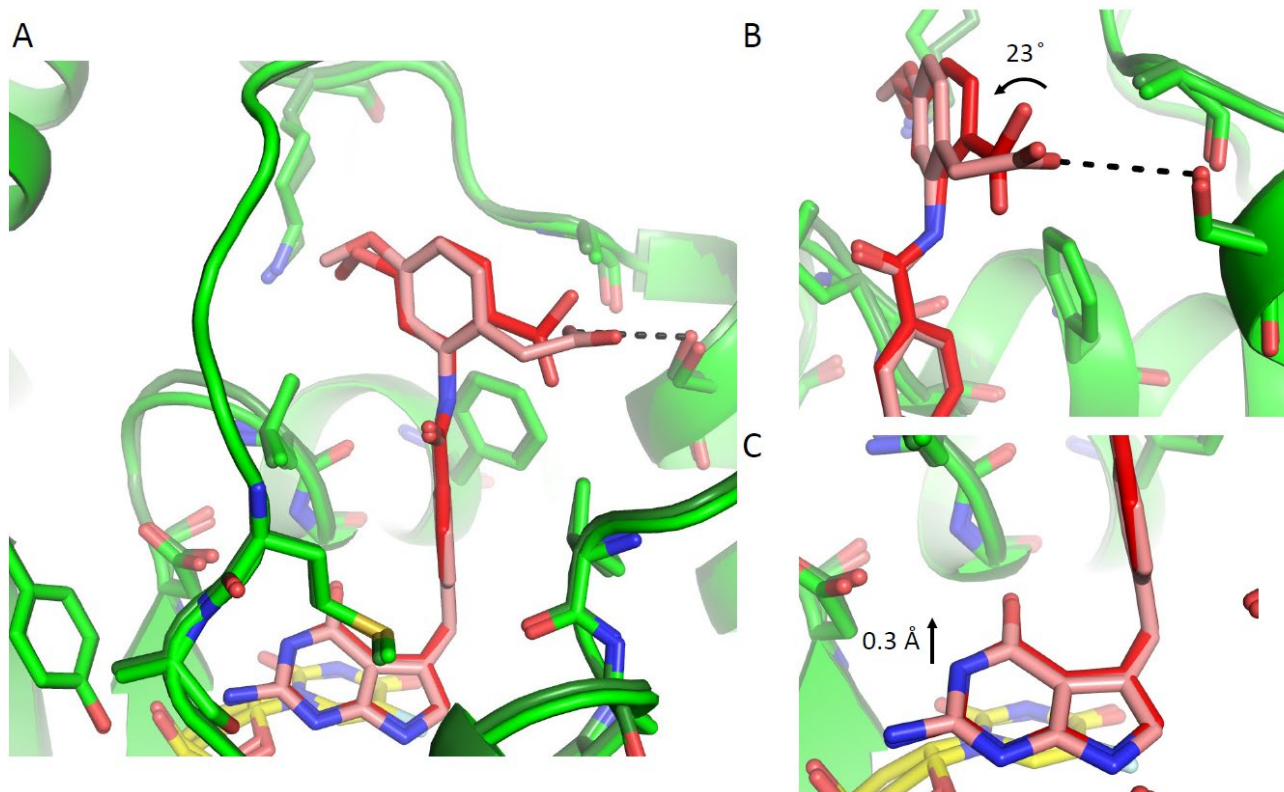

**Figure S6.** Comparison of *ChTS* bound to **16** (green/red) and *ChTS* bound to **23** (dark green/salmon) with FdUMP (yellow) (PDB: 6PFE and 6PFC). A. Comparison of **16** and **23** bound in *ChTS* active site, hydrogen bonds to **23** black dotted line. B. Zoom in view rotation of **23** 2-phenylacetic acid moiety with respect to **16** benzoic acid moiety. C. Zoom in view of shift of pyrrolo[2,3-d]pyrimidine moiety of **16** and **23**.

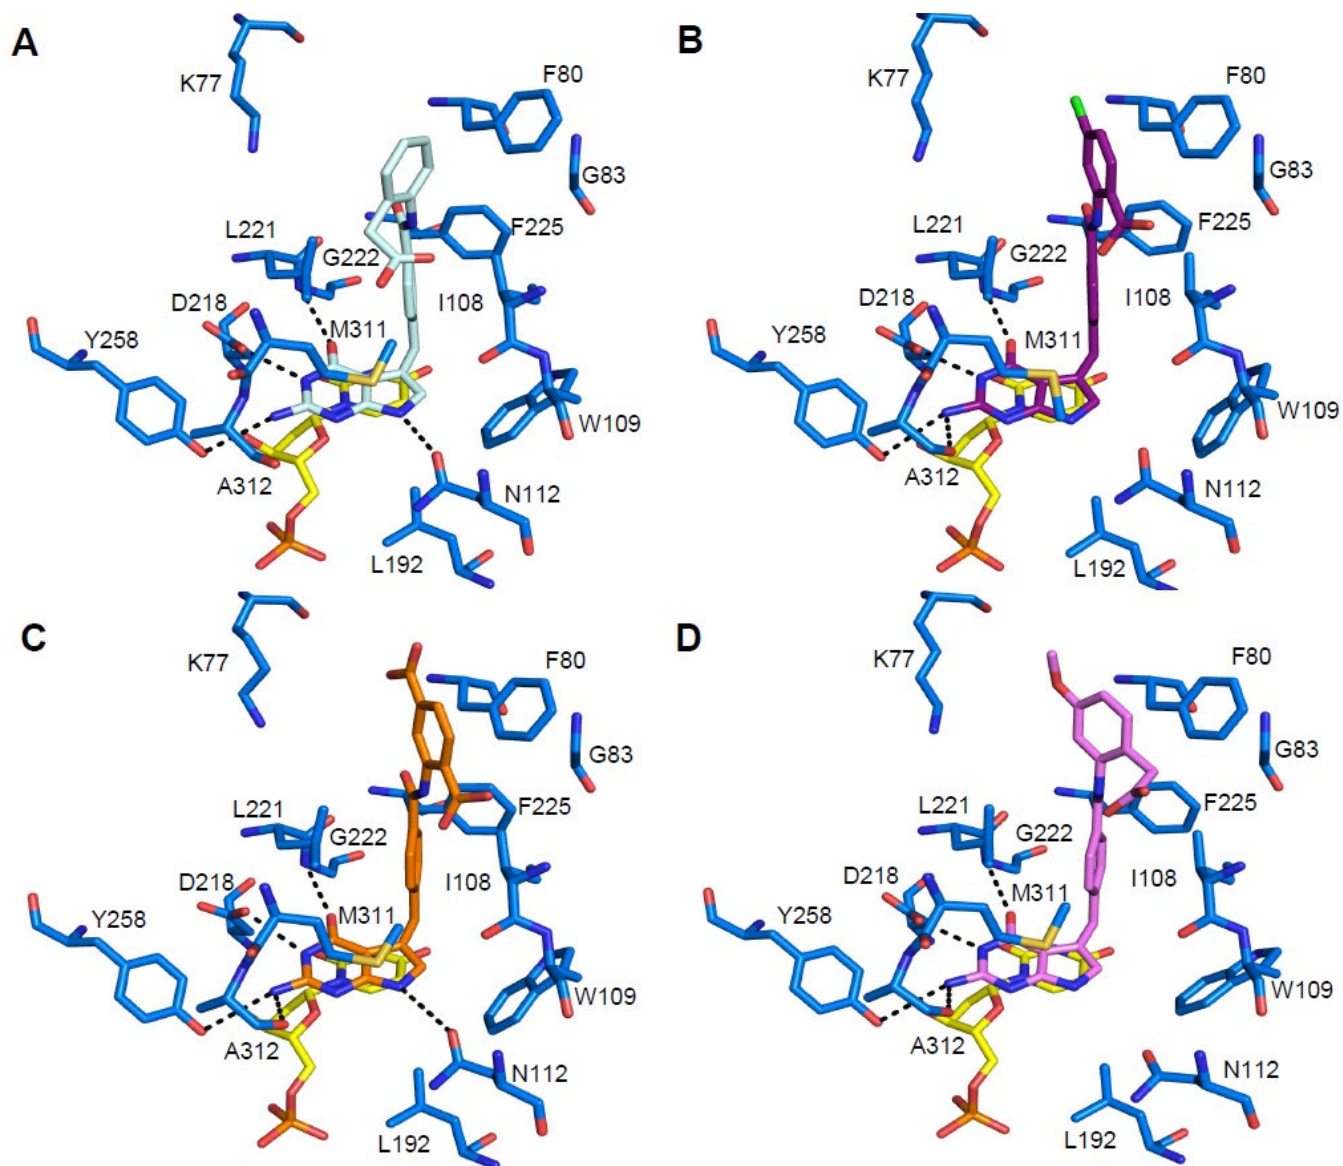

**Figure S7.** Active site residues of hTS (blue) (PDB: 6PF4, 6PF3, 6PF6 and 6PF5). A. hTS complexed with **5** (light cyan) and dUMP (yellow). B. hTS complexed with **14** (dark purple) and dUMP (yellow). C. hTS complexed with **15** (orange) and dUMP (yellow). D. hTS complexed with **23** (violet) and dUMP (yellow). Hydrogen bonding interactions with active site residues designated by black dotted lines.

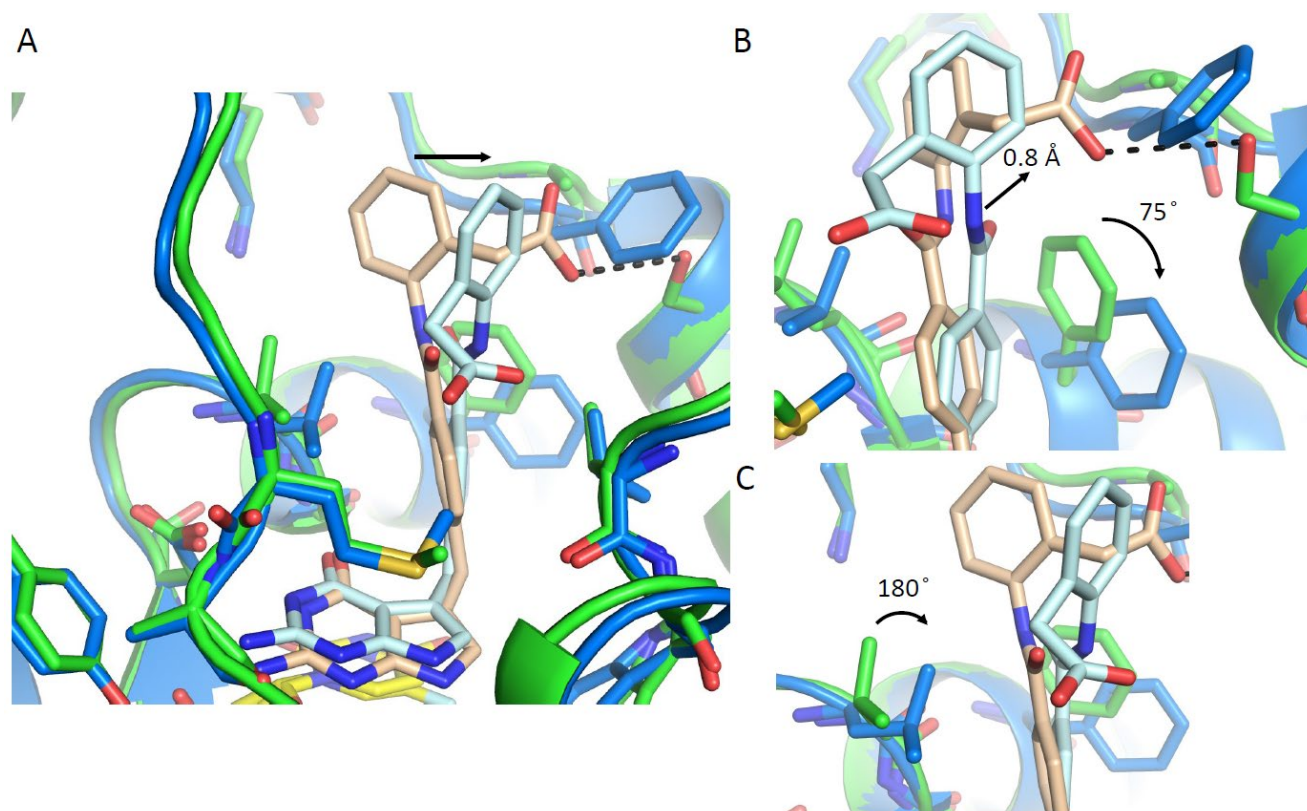

**Figure S8.** Comparison of hTS bound to **5** (blue/light cyan) and ChTS bound to **5** (green/wheat) with dUMP or FdUMP, respectively (yellow) (PDB: 6PF9 and 6PF4). A. Comparison of **5** bound in hTS and ChTS active site, hydrogen bond between ChTS and **5** black dotted line. B. Zoom in view hTS residue F225 and ChTS residue F433 position upon binding **5**. C. Zoom in view hTS residue L221 and ChTS residue L429 position upon binding **5**.

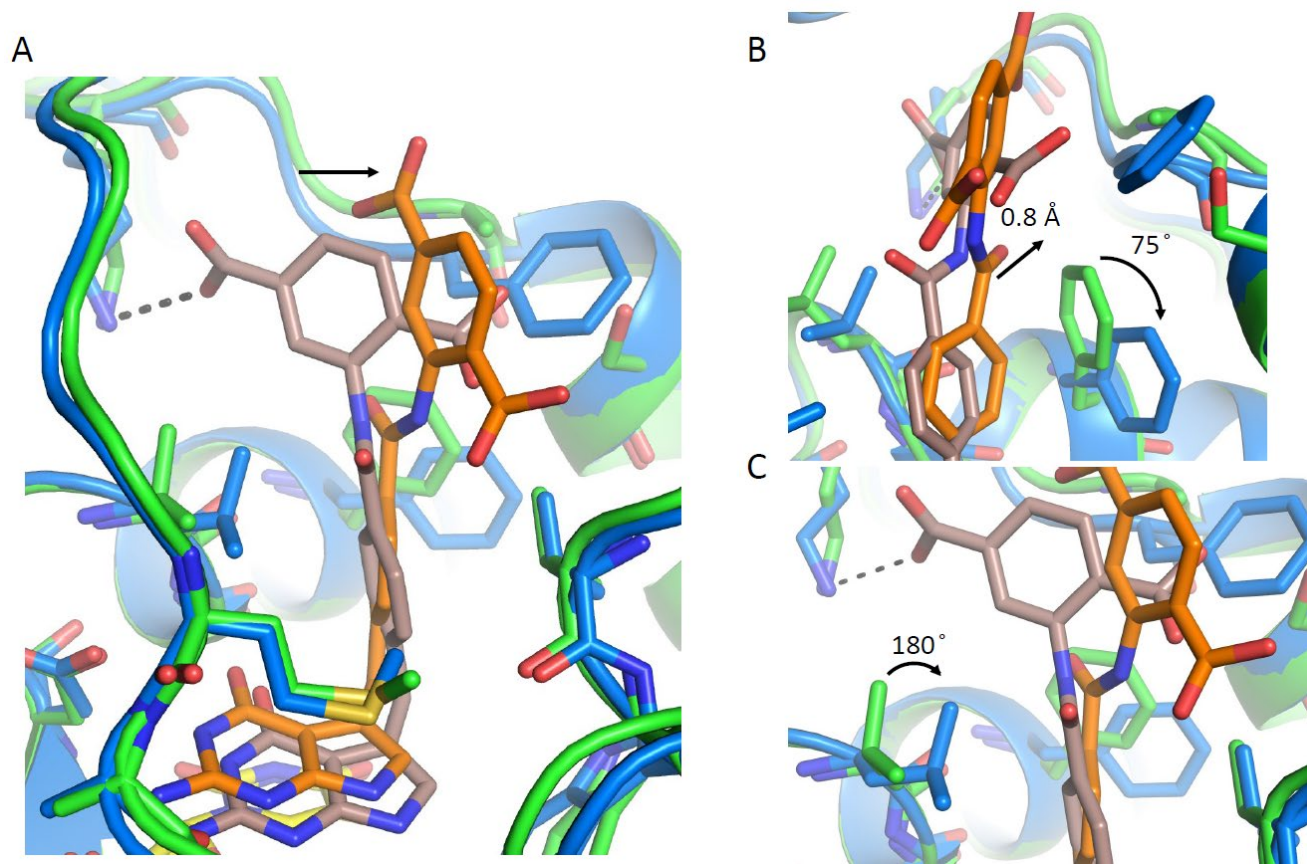

**Figure S9.** Comparison of hTS bound to **15** (blue/orange) and *Ch*TS bound to **15** (green/light brown) with dUMP or FdUMP, respectively (yellow) (PDB: 6PFD and 6PF6). A. Comparison of **15** bound in hTS and *Ch*TS active site, hydrogen bond between *Ch*TS and **15** black dotted line. B. Zoom in view hTS residue F225 and *Ch*TS residue F433 position upon binding **15**. C. Zoom in view hTS residue L221 and *Ch*TS residue L429 position upon binding **15**.

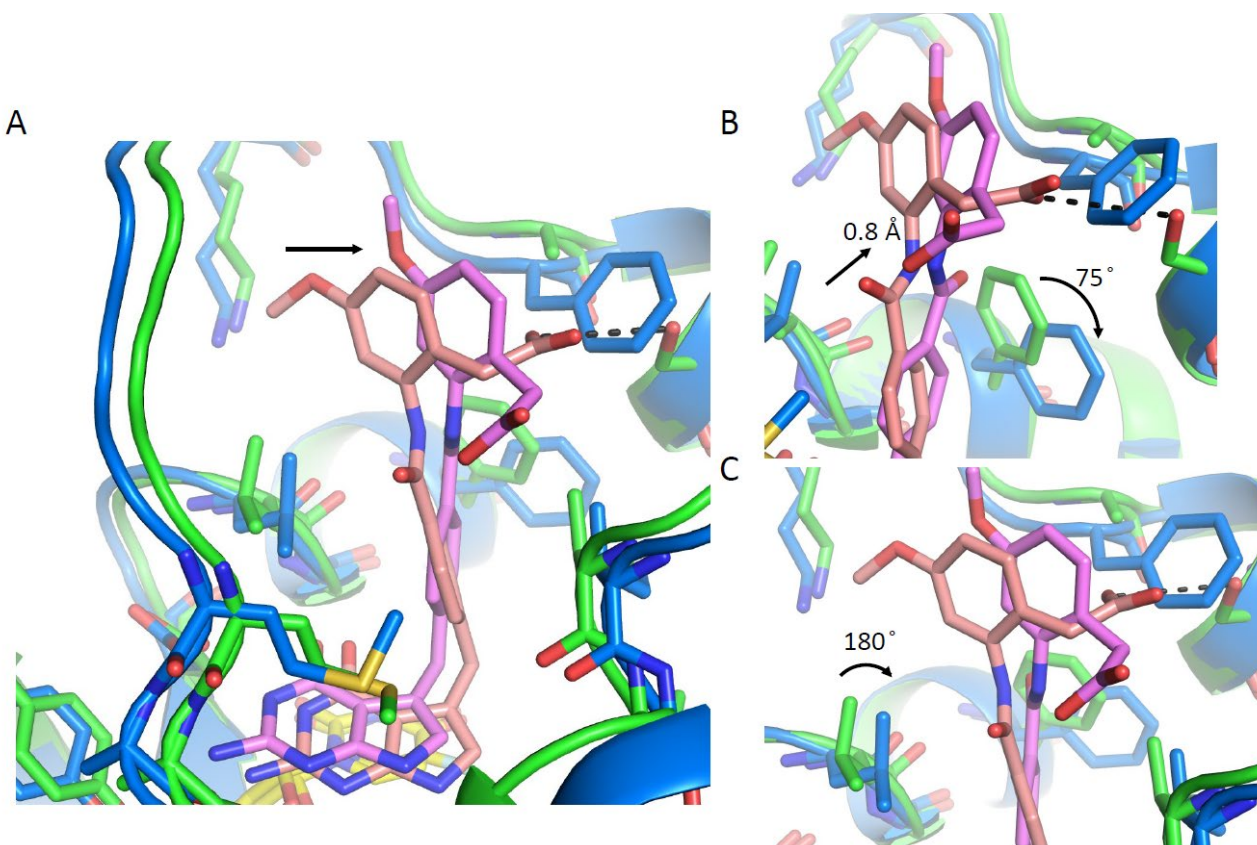

**Figure S10.** Comparison of hTS bound to **23** (blue/violet) and ChTS bound to **23** (green/salmon) with dUMP or FdUMP, respectively (yellow) (PDB: 6PFC and 6PF5). A. Comparison of **23** bound in hTS and ChTS active site, hydrogen bond between ChTS and **23** black dotted line. B. Zoom in view hTS residue F225 and ChTS residue F433 position upon binding **23**. C. Zoom in view hTS residue L221 and ChTS residue L429 position upon binding **23**.

## 7. References

- [1] L. Bauer, S.V. Miarka, Stereospecific Lossen Rearrangements, *The Journal of Organic Chemistry*, 24 (1959) 1293-1296.
- [2] J. Sheppeck, Preparation of hydantoin as inhibitors of matrix metalloproteinases and/or TNF- $\alpha$  converting enzyme (TACE), in, Bristol-Myers Squibb Company, USA . 2004, pp. 43 pp.
- [3] J.Y. Lee, D.J. Choo, Y.D. Kim, C.R. Oh, Preparation of 3,4-dihydroquinazolines as T-type calcium channel blockers and anticancer drugs, in, Dongwoo Syntech Co., Ltd., S. Korea . 2008, pp. 27pp.
- [4] S.A. Dietrich, R. Lindauer, C. Stierlin, J. Gertsch, R. Matesanz, S. Notararigo, J.F. Díaz, K.-H. Altmann, Epothilone Analogues with Benzimidazole and Quinoline Side Chains: Chemical Synthesis, Antiproliferative Activity, and Interactions with Tubulin, *Chemistry – A European Journal*, 15 (2009) 10144-10157.
- [5] S.K. Bhattacharya, K.O.K. Cameron, D.P. Fernando, D.W.-S. Kung, A.T. Londregan, K.F. McClure, S.T.M. Simila, 2,3-Dihydro-1H-inden-1-yl-2,7-diazaspiro[3.6]nonane derivatives as ghrelin receptor antagonists or inverse agonists and their preparation and use for the treatment of ghrelin receptor-mediated diseases, in, Pfizer Inc., USA . 2011, pp. 193pp.
- [6] V.P. Kumar, J.A. Cisneros, K.M. Frey, A. Castellanos-Gonzalez, Y. Wang, A. Gangjee, A.C. White, Jr., W.L. Jorgensen, K.S. Anderson, Structural studies provide clues for analog design of specific inhibitors of *Cryptosporidium hominis* thymidylate synthase-dihydrofolate reductase, *Bioorg Med Chem Lett*, 24 (2014) 4158-4161.
